# Supplementary material for: On Detecting Incomplete Soft or Hard Selective Sweeps Using Haplotype Structure
Source: PubMed Central journal article supplement — Mol Biol Evol. 2014 Feb 18;31(5):1275–91. doi: 10.1093/molbev/msu077 (PMC3995338; doi:10.1093/molbev/msu077), 2014-02-18
Supplement: supp_msu077_SuplemantaryMat.pdf [file supp_msu077_SuplemantaryMat.pdf]

Supplementary Figure 1. Distribution of  $iH_S$  and  $nS_L$  with population growth and population bottlenecks.

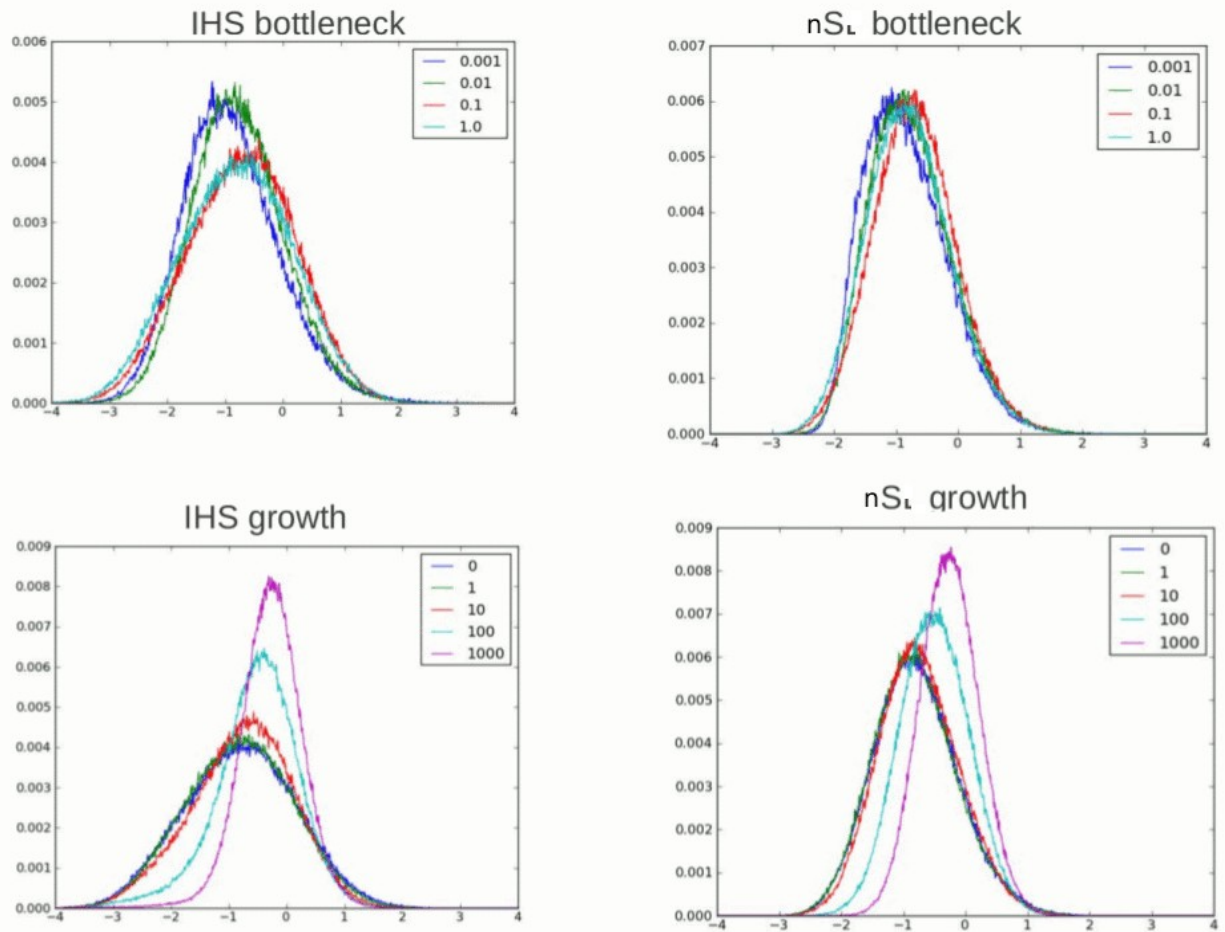

The top two panels show the distribution of  $iH_S$  and  $nS_L$  under a range of bottleneck strengths ( $r = 0.001, 0.01, 0.1$  and  $1$ ). Each color corresponds to a different bottleneck strength, as indicated in the embedded legend. The x-axis displays the score of  $iH_S$  and  $nS_L$  (top left panel and top right panel, respectively). The bottom two panels show the distribution of  $iH_S$  and  $nS_L$  for a range of growth rates ( $\alpha = 0, 1, 10, 100, 1000$ ) in a model of exponential population growth. Each color corresponds to the growth rate indicated in the embedded legend.

Supplementary Figure 2A and 2B. Power curves with selection.

### Starting Allele Frequency

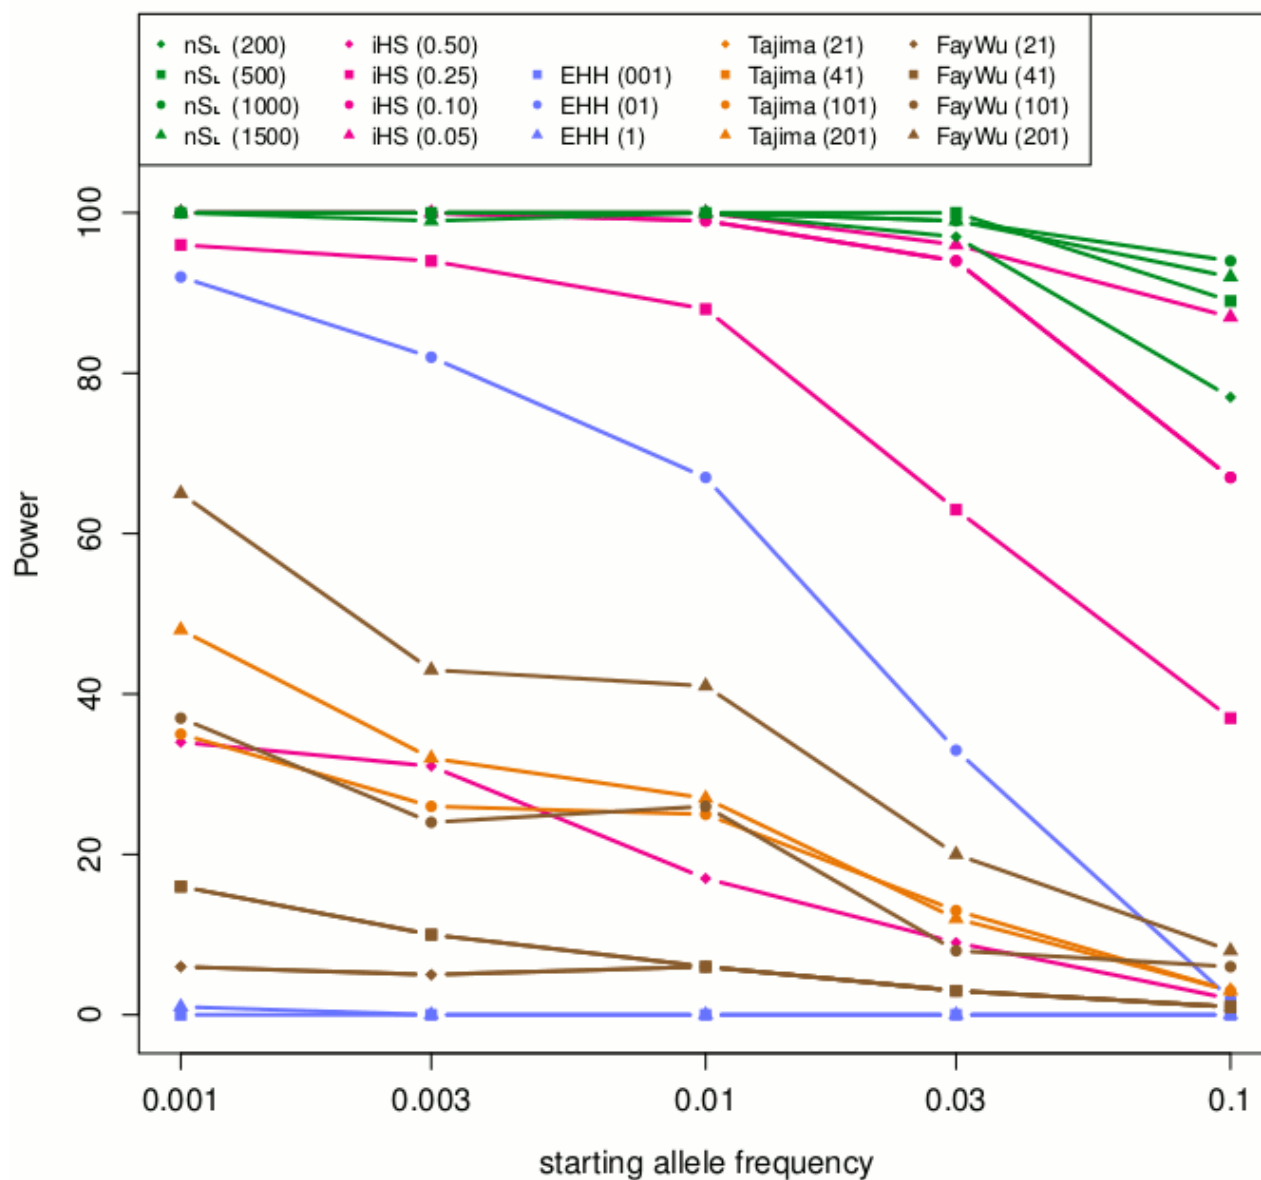

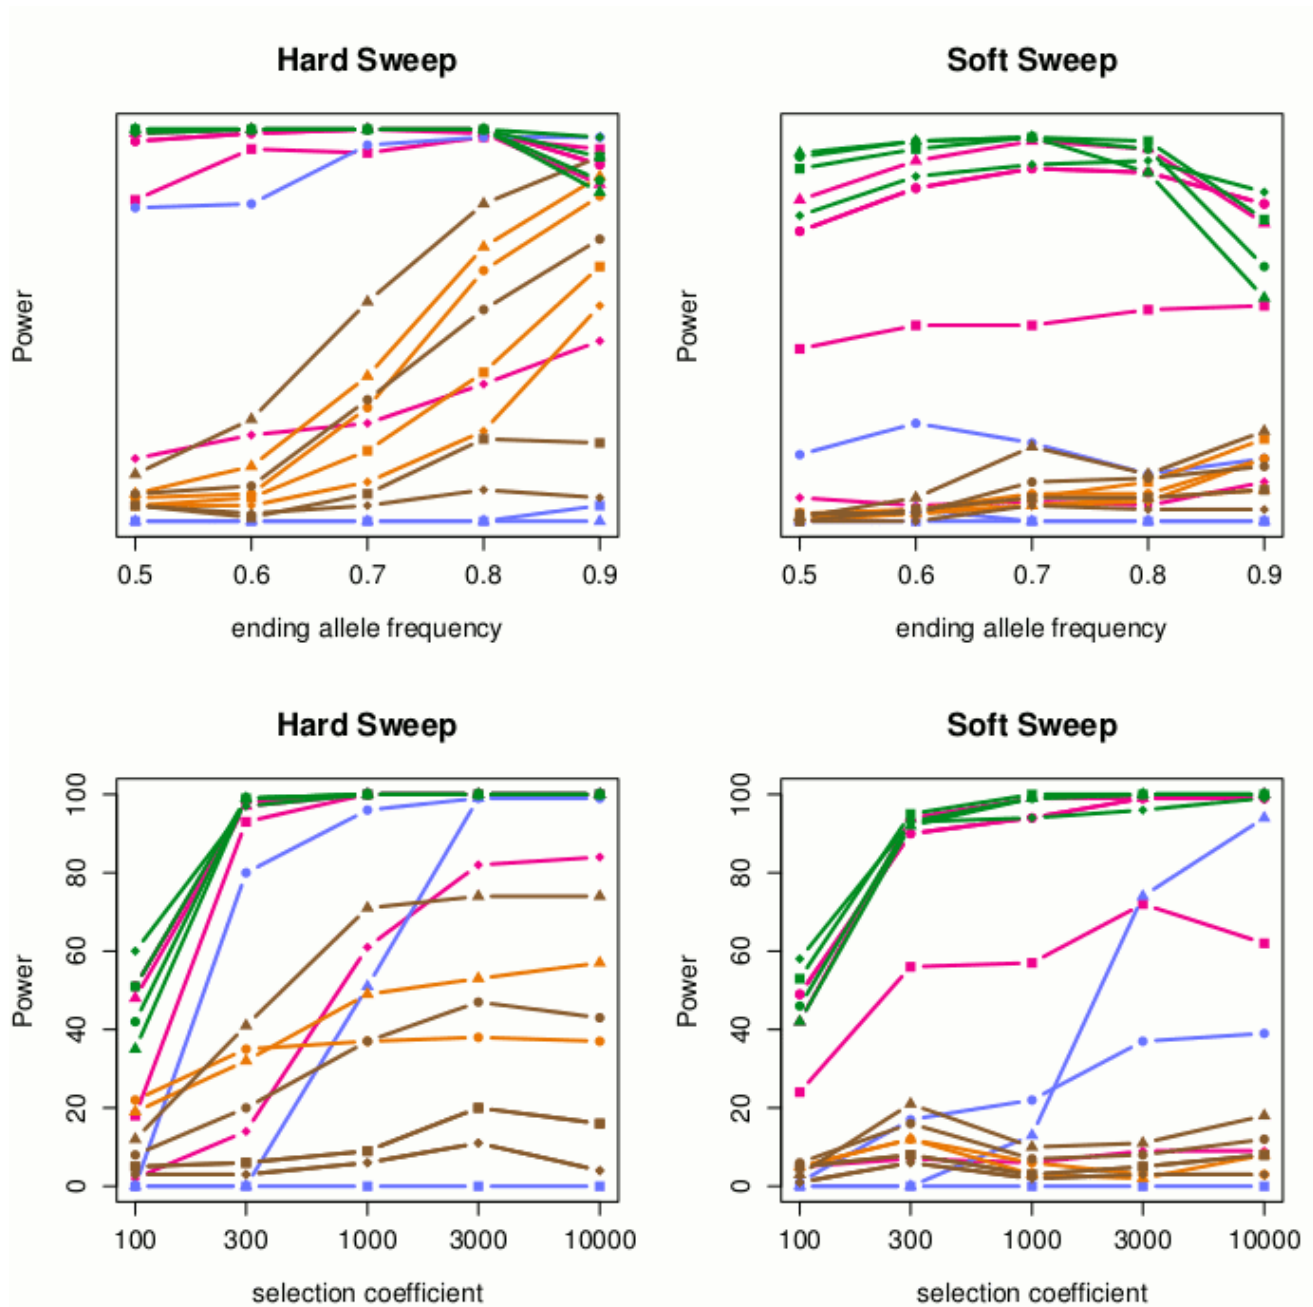

Supplementary Figure 2A shows the power of five methods ( $nS_L$ ,  $iHS$ ,  $EHH$ , Tajima's  $D$  and Fay and Wu's  $H$ ) towards a range of starting allele frequencies (0.001-0.1). Power is defined as the proportion of simulations that reject the neutral null hypothesis at the 5% significance level. Each color corresponds to a method and symbols correspond to the window sizes used to run the methods (the specific window sizes used for the analysis are given in parenthesis). Supplementary Figure 2B is divided in four panels. The top two show the power of the five methods towards a range of ending allele frequencies (0.5-0.9). Power is again defined as the proportion of simulations rejecting the null hypothesis at the 5% significance level. The bottom two panels show the power of these methods towards a range of selection coefficients (100-10000). The color scheme and symbols in these panels correspond to the legend embedded in Supplementary Figure 2A.

Supplementary Figure 2C. Power curves with selection ( $s=50$ ) for three growth rates.

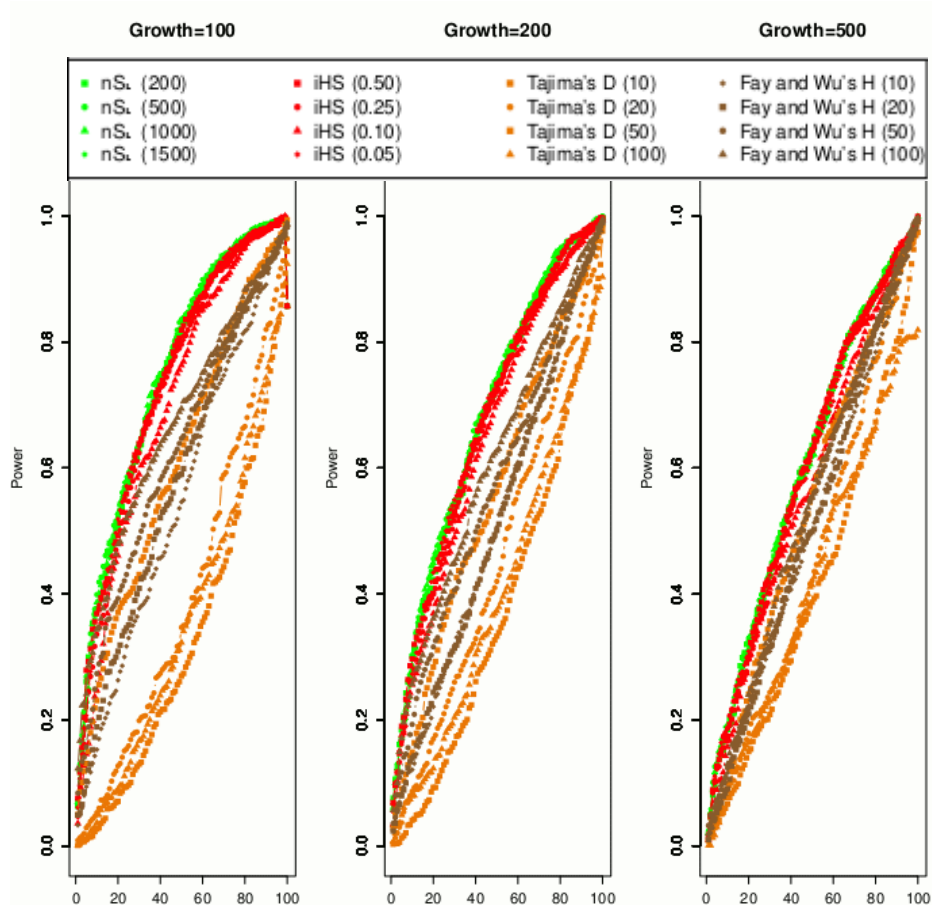

Supplementary Figure 2D. Power curves with selection ( $s=100$ ) for three growth rates.

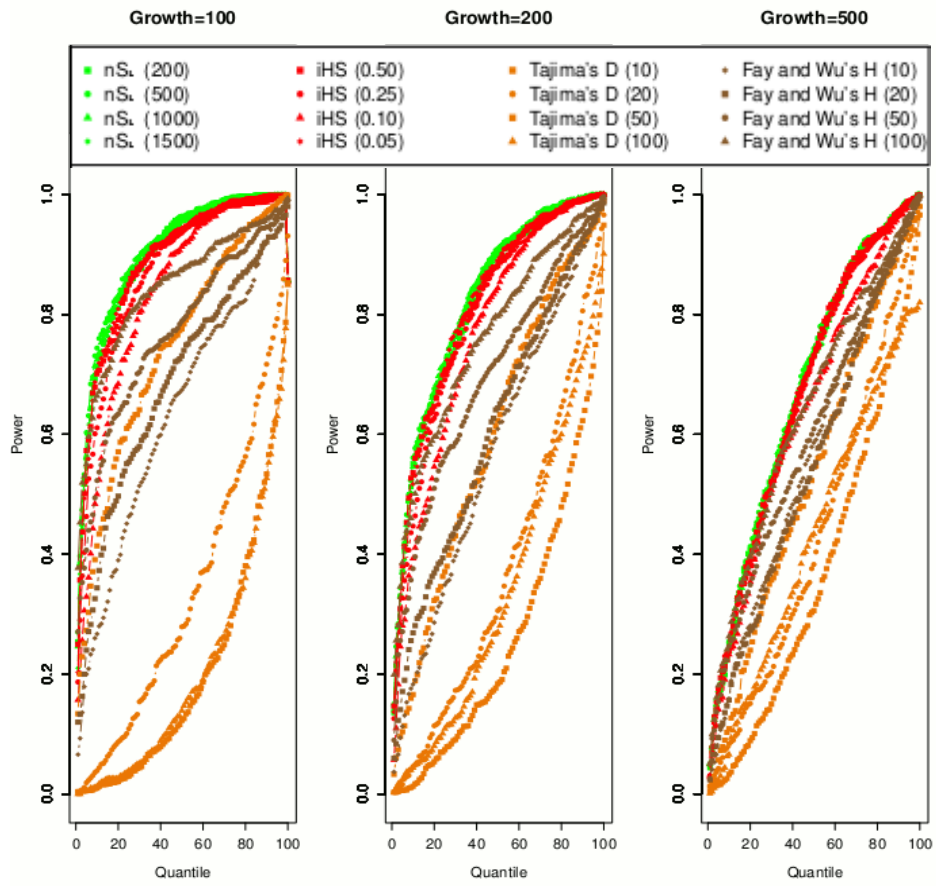

Supplementary Figure 2E. Power curves with selection ( $s=200$ ) for three growth rates.

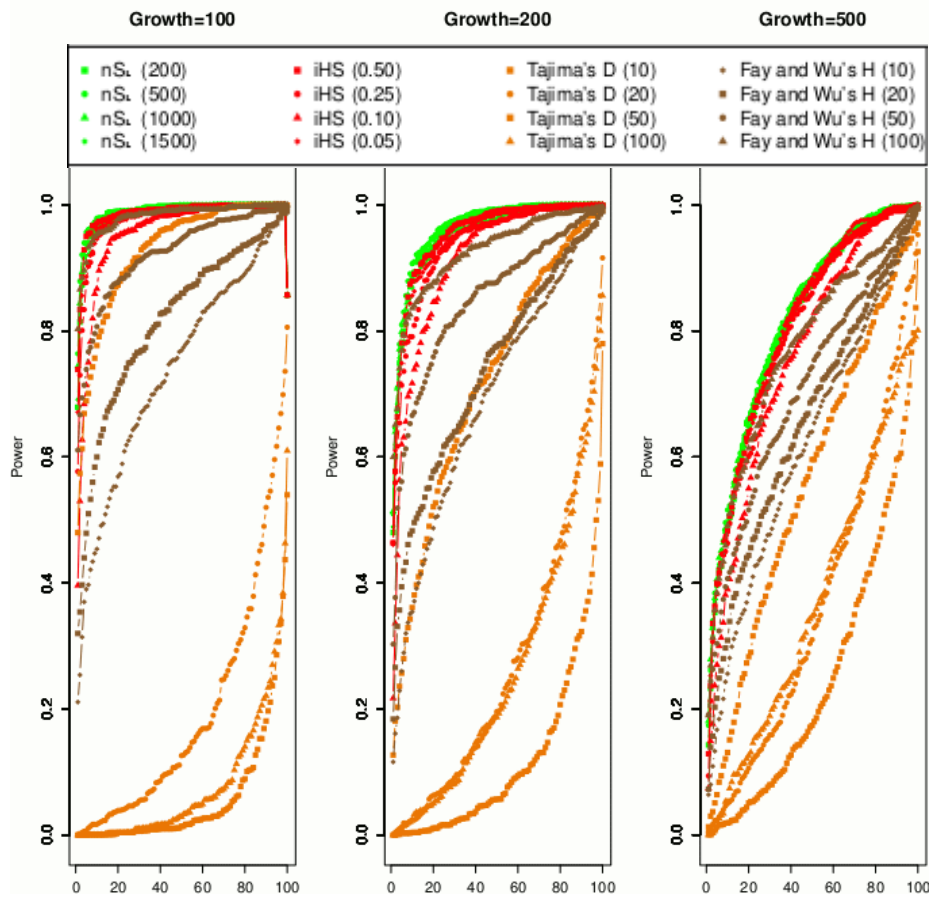

Supplementary Figure 2C, 2D and 2E show the power of four methods (nS<sub>L</sub>, iHS, Tajima's D and Fay and Wu's H) for a selection coefficient ( $s$ ) of 50, 100 and 200, respectively. Each figure contains three plots that correspond to three growth rates ( $\alpha=100, 200$  and 500). As in figure 2A and 2B, power is defined as the proportion of simulations that reject the neutral null hypothesis at the 5% significance level. The y-axis shows power, the x-axis shows the false positive rate. Each color corresponds to a method and symbols correspond to the window sizes used to run the methods (the specific window sizes used for the analysis are given after the underscore), as indicated by the legend embedded.

Supplementary Figure 3. Top 50  $nS_L$  outliers in the MKK population.

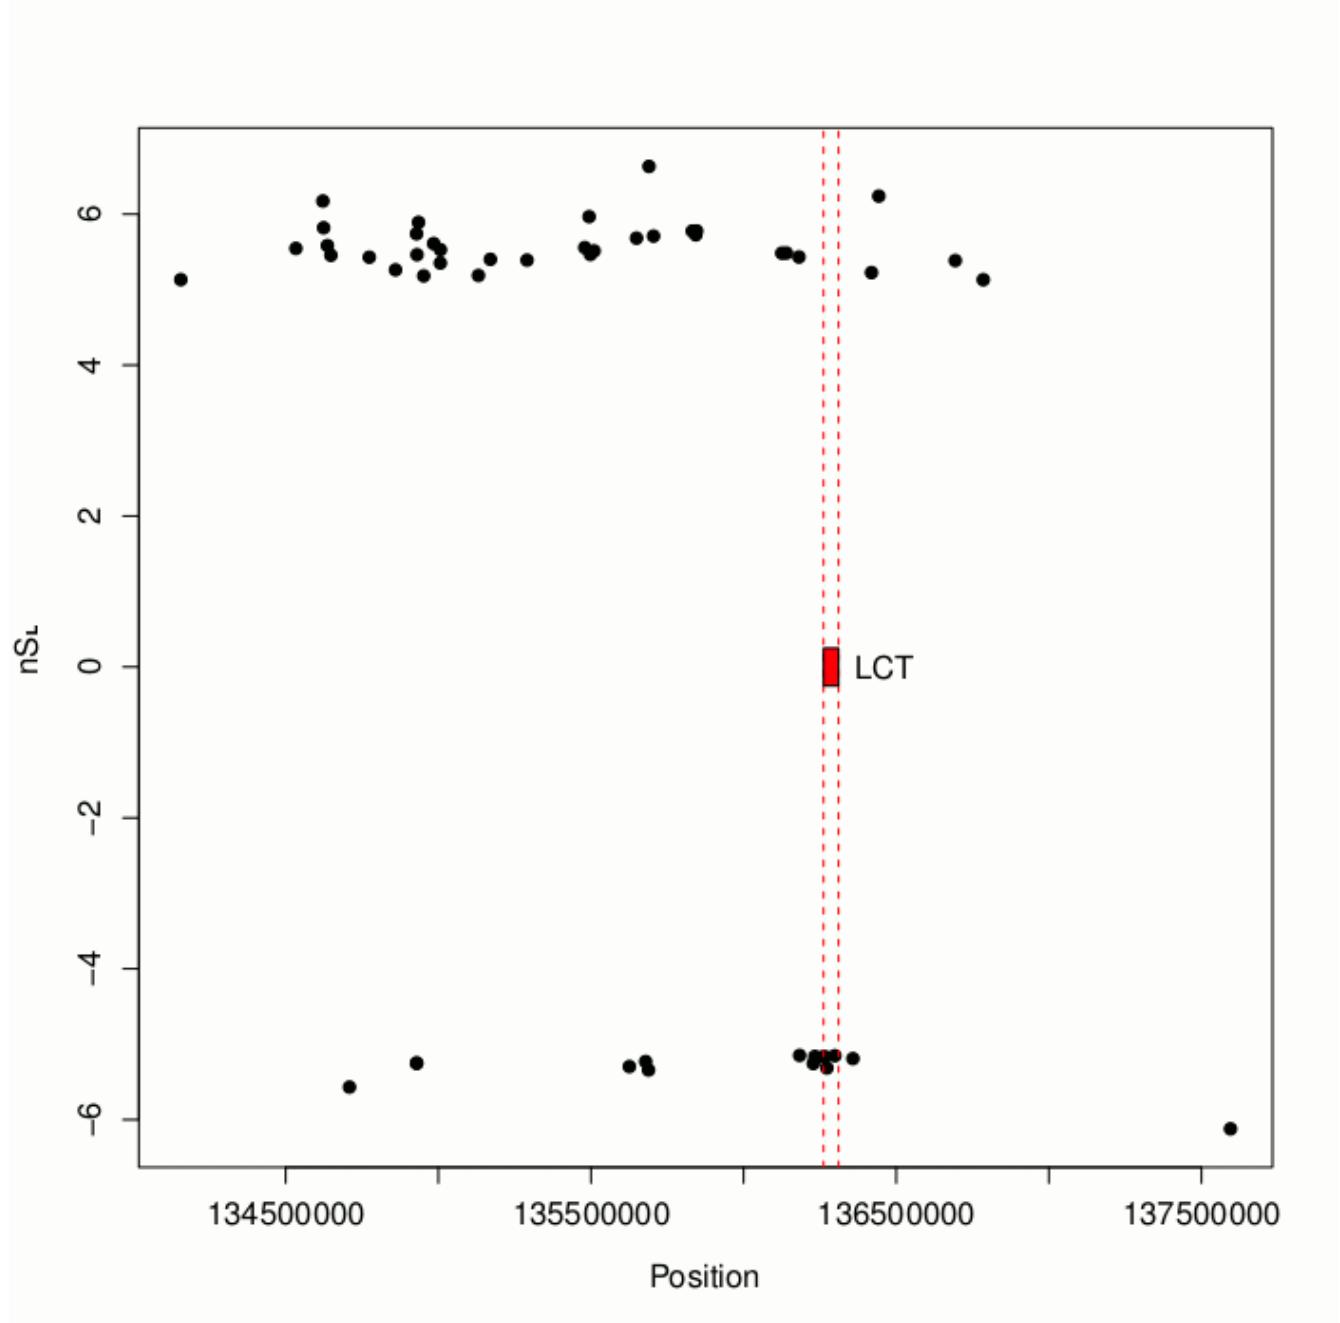

The y-axis shows  $nS_L$  score for the top 50 SNPs in the Maasai population (MKK). The x-axis shows the position of these SNPs. All of them are located within 3.4 MB in chromosome 2. This region contains the lactose resistance gene (LCT) (indicated with a red box), which has previously described to be under selection in the Maasai population.



Supplementary Figure 4. Linkage disequilibrium (LD) plot for 1.4 MB centered at the top score in MKK.

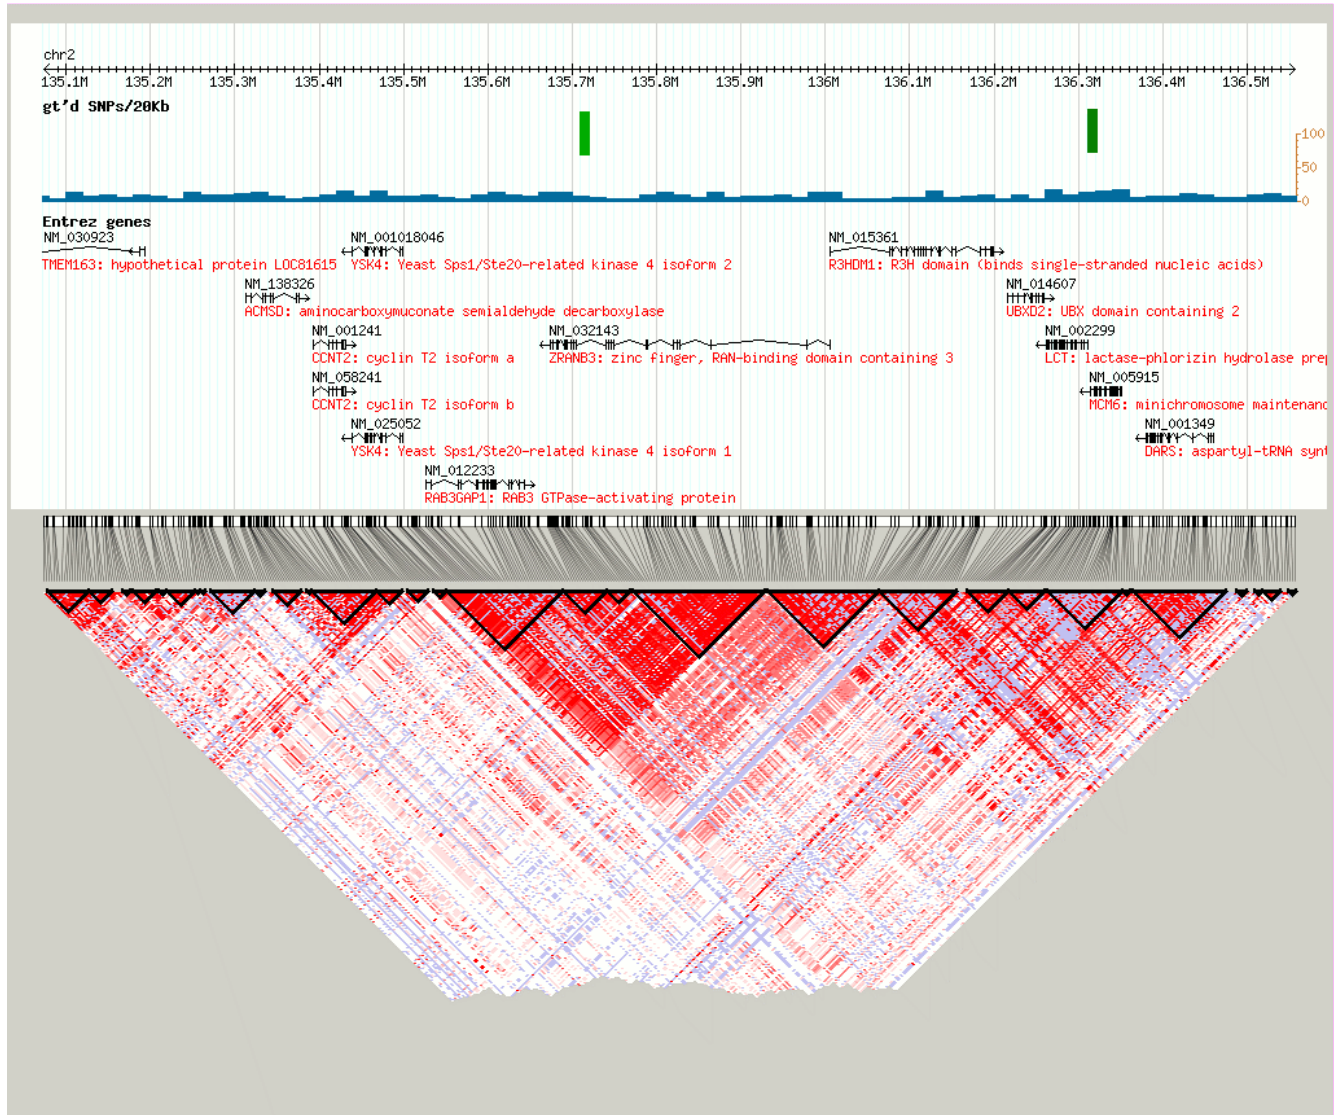

The degree of LD along the region is shown by  $D'$  between pairs of SNPs. The brighter the color the higher the  $D'$  between the SNPs. The site with the highest score in MKK is located in *ZRANB3* (vertical light green bar). The approximate position of the sites previously described to be under positive selection in MKK is indicated by a vertical dark green line (5' extreme of *LCT*). Notice there is some LD between the *ZRANB3* and *LCT*.



Supplementary Figure 5. Dependency of  $nS_L$  on frequency.

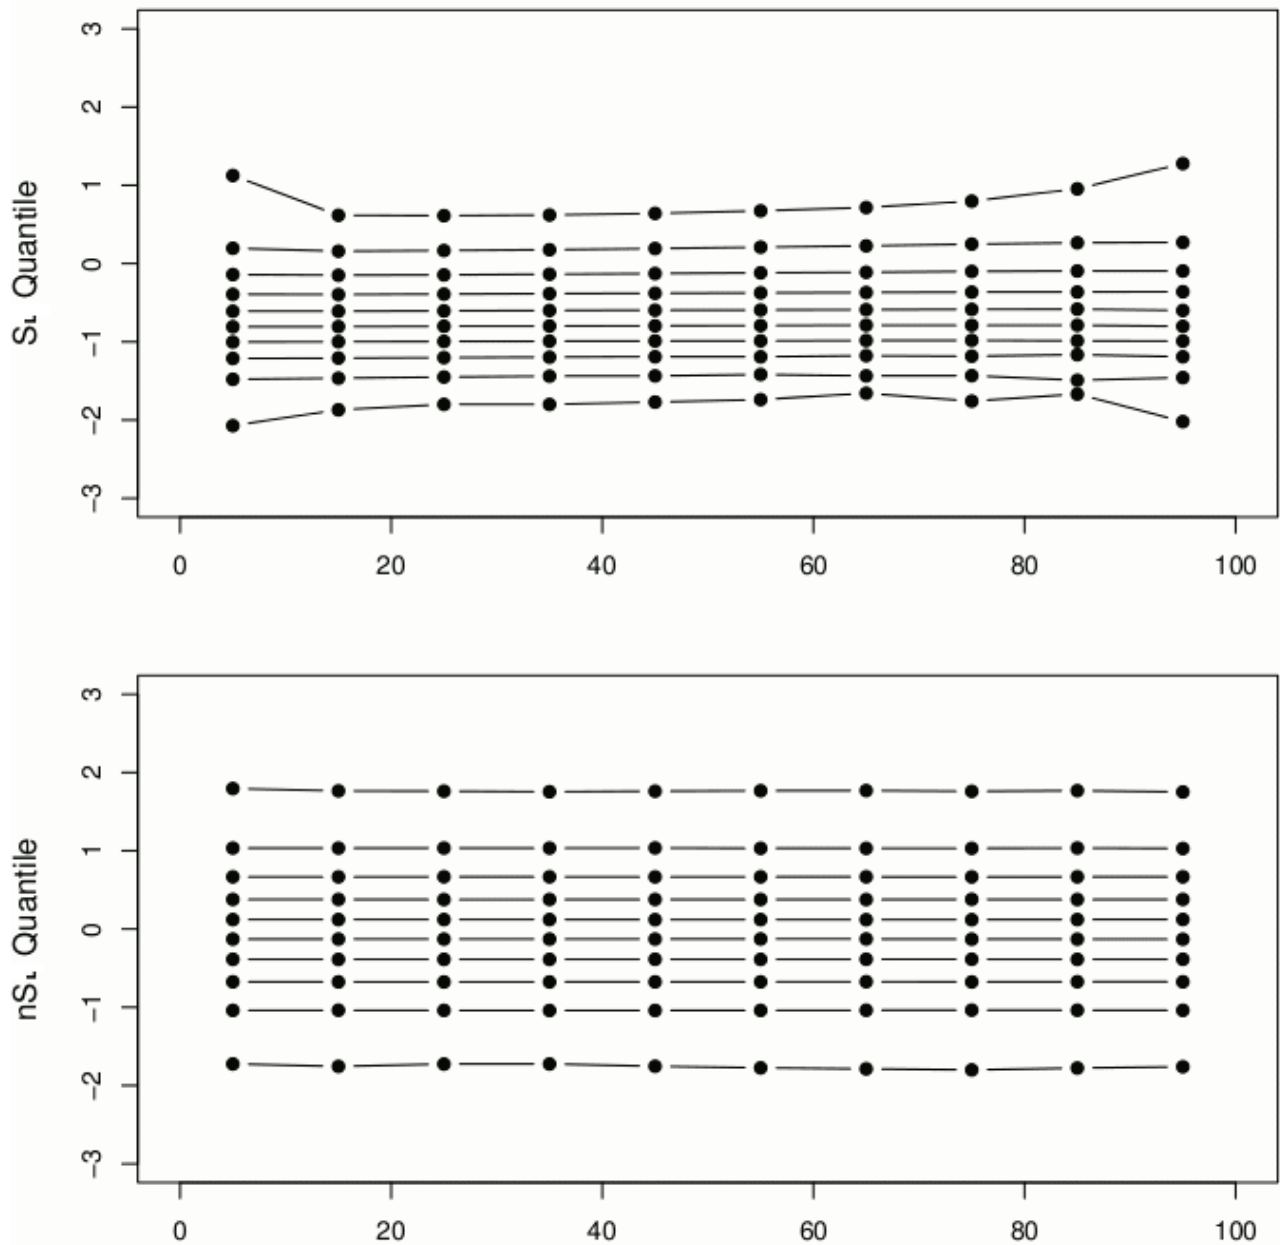

The top panel (A) shows the non-standardized  $nS_L$  (y-axis) versus the Derived Allele Frequency (DAF) (x-axis). Values on the y-axis correspond to the  $nS_L$  score from 10th to the 100th percentile of the  $nS_L$  distribution in 10th increments (from top to bottom). The bottom panel (B) shows the quantile for  $nS_L$  standardized by frequency bins (y-axis) versus DAF (x-axis). Note the dependency of  $nS_L$  on DAF is highest for extreme DAFs and extreme  $nS_L$  quantiles. Also note, standardization mitigates the dependency.

Supplementary Table 1. Samples used in this study.

| Population label | Population sample                           | Total number of samples | Non-closely related samples |
|------------------|---------------------------------------------|-------------------------|-----------------------------|
| ASW              | African ancestry in Southwest USA           | 83                      | 42                          |
|                  | Utah residents with Northern and Western    |                         |                             |
| CEU              | European ancestry from the CEPH collection  | 165                     | 107                         |
| CHB              | Han Chinese in Beijing, China               | 84                      | 84                          |
| JPT              | Japanese in Tokyo, Japan                    | 86                      | 86                          |
| CHD              | Chinese in Metropolitan Denver, Colorado    | 85                      | 83                          |
| GIH              | Gujarati Indians in Houston, Texas          | 88                      | 83                          |
| LWK              | Luhya in Webuye, Kenya                      | 90                      | 72                          |
| MEX              | Mexican ancestry in Los Angeles, California | 77                      | 40                          |
| MKK              | Maasai in Kinyawa, Kenya                    | 171                     | 53                          |
| TSI              | Toscans in Italy                            | 88                      | 85                          |
| YRI              | Yoruba in Ibadan, Nigeria                   | 167                     | 110                         |
|                  | <b>Total</b>                                | <b>1184</b>             | <b>845</b>                  |

Population label (as determined by the international HapMap project release 3), description of the population (brief description of the region of origin followed by country), original number of samples included in HapMap3 and number of samples used in this study after excluding individuals whose genome we estimated to be > 5% in IBD.

Supplementary Table 2. SNPs included in this study.

| Chromosome   | N_of_SNPs      | SNPs in<br>snp129OrthoPt<br>2Pa2Rm2 | Discordant<br>allele in 2 or<br>more species |
|--------------|----------------|-------------------------------------|----------------------------------------------|
| 1            | 115689         | 115217                              | 4434                                         |
| 2            | 116430         | 115488                              | 4241                                         |
| 3            | 96537          | 95771                               | 3466                                         |
| 4            | 85772          | 85180                               | 3067                                         |
| 5            | 87919          | 87158                               | 3185                                         |
| 6            | 91357          | 90159                               | 4219                                         |
| 7            | 75248          | 74512                               | 3003                                         |
| 8            | 75272          | 74596                               | 2862                                         |
| 9            | 62815          | 63007                               | 2363                                         |
| 10           | 73832          | 73162                               | 2834                                         |
| 11           | 70973          | 70206                               | 3369                                         |
| 12           | 68525          | 67877                               | 2804                                         |
| 13           | 51915          | 51295                               | 2009                                         |
| 14           | 45474          | 45075                               | 1639                                         |
| 15           | 42353          | 41961                               | 1471                                         |
| 16           | 44648          | 44068                               | 1913                                         |
| 17           | 38401          | 37842                               | 1808                                         |
| 18           | 40824          | 40553                               | 1534                                         |
| 19           | 26238          | 25510                               | 2359                                         |
| 20           | 36258          | 35999                               | 1449                                         |
| 21           | 19306          | 19125                               | 838                                          |
| 22           | 20082          | 19706                               | 1229                                         |
| <b>total</b> | <b>1385868</b> | <b>1373467</b>                      | <b>56096</b>                                 |

List of the human autosomes, number of SNPs in each autosome (phased haplotype data from HapMap3); SNPs with corresponding allele information on the snp129OrthoPt2Pa2Rm2 from UCSC database and number of SNPs with discordant alleles in 2 or more species (includes SNPs with unavailable allele information and SNPs with discrepant alleles among species).

Supplementary Table 3. Total variation distance between the reference distribution and the distribution varying growth rate, bottleneck ratio, migration rate and recombination rate for five statistics.

|                    | Growth rate (Ref=0) |       |       |       | Bottleneck ratio (Ref=1) |       |       |       |       | Migration rate (Ref=0) |       |       |       |       | Recombination rate (Ref=2000) |       |       |       |       |       |       |       |
|--------------------|---------------------|-------|-------|-------|--------------------------|-------|-------|-------|-------|------------------------|-------|-------|-------|-------|-------------------------------|-------|-------|-------|-------|-------|-------|-------|
|                    | 0                   | 1     | 10    | 100   | 1000                     | 1     | 0.5   | 0.25  | 0.1   | 0.05                   | 0     | 0.001 | 0.01  | 0.1   | 1                             | 10    | 0     | 200   | 400   | 1000  | 2000  | 4000  |
| nSL_100            | 0.000               | 0.019 | 0.036 | 0.189 | 0.362                    | 0.000 | 0.127 | 0.167 | 0.117 | 0.070                  | 0.000 | 0.413 | 0.297 | 0.177 | 0.067                         | 0.026 | 0.038 | 0.043 | 0.034 | 0.023 | 0.000 | 0.032 |
| nSL_200            | 0.000               | 0.017 | 0.030 | 0.193 | 0.377                    | 0.000 | 0.113 | 0.148 | 0.105 | 0.064                  | 0.000 | 0.394 | 0.264 | 0.134 | 0.055                         | 0.024 | 0.037 | 0.044 | 0.033 | 0.025 | 0.000 | 0.033 |
| nSL_500            | 0.000               | 0.028 | 0.042 | 0.209 | 0.396                    | 0.000 | 0.114 | 0.134 | 0.093 | 0.059                  | 0.000 | 0.353 | 0.213 | 0.097 | 0.042                         | 0.038 | 0.038 | 0.042 | 0.034 | 0.027 | 0.000 | 0.038 |
| nSL_1000           | 0.000               | 0.034 | 0.064 | 0.229 | 0.404                    | 0.000 | 0.121 | 0.140 | 0.102 | 0.072                  | 0.000 | 0.326 | 0.178 | 0.083 | 0.037                         | 0.047 | 0.050 | 0.052 | 0.042 | 0.032 | 0.000 | 0.042 |
| nSL_1500           | 0.000               | 0.033 | 0.072 | 0.234 | 0.403                    | 0.000 | 0.120 | 0.137 | 0.103 | 0.075                  | 0.000 | 0.305 | 0.162 | 0.079 | 0.035                         | 0.050 | 0.053 | 0.052 | 0.043 | 0.031 | 0.000 | 0.040 |
| iHS_0.50           | 0.000               | 0.099 | 0.226 | 0.397 | 0.499                    | 0.000 | 0.313 | 0.280 | 0.190 | 0.141                  | 0.000 | 0.145 | 0.135 | 0.109 | 0.052                         | 0.053 | 0.112 | 0.107 | 0.088 | 0.051 | 0.000 | 0.072 |
| iHS_0.25           | 0.000               | 0.080 | 0.201 | 0.405 | 0.534                    | 0.000 | 0.294 | 0.278 | 0.203 | 0.147                  | 0.000 | 0.123 | 0.130 | 0.110 | 0.051                         | 0.027 | 0.108 | 0.111 | 0.090 | 0.054 | 0.000 | 0.076 |
| iHS_0.10           | 0.000               | 0.064 | 0.165 | 0.404 | 0.592                    | 0.000 | 0.240 | 0.229 | 0.167 | 0.123                  | 0.000 | 0.136 | 0.116 | 0.095 | 0.054                         | 0.041 | 0.094 | 0.091 | 0.077 | 0.051 | 0.000 | 0.066 |
| iHS_0.05           | 0.000               | 0.051 | 0.133 | 0.347 | 0.533                    | 0.000 | 0.189 | 0.183 | 0.135 | 0.098                  | 0.000 | 0.141 | 0.097 | 0.077 | 0.049                         | 0.048 | 0.076 | 0.076 | 0.064 | 0.044 | 0.000 | 0.054 |
| EHH_2              | 0.000               | 0.079 | 0.205 | 0.302 | 0.457                    | 0.000 | 0.263 | 0.221 | 0.180 | 0.153                  | 0.000 | 0.124 | 0.138 | 0.140 | 0.186                         | 0.248 | 0.080 | 0.073 | 0.064 | 0.038 | 0.000 | 0.054 |
| EHH_20             | 0.000               | 0.194 | 0.407 | 0.609 | 0.831                    | 0.000 | 0.459 | 0.403 | 0.345 | 0.307                  | 0.000 | 0.204 | 0.226 | 0.225 | 0.254                         | 0.306 | 0.208 | 0.193 | 0.164 | 0.096 | 0.000 | 0.121 |
| EHH_200            | 0.000               | 0.099 | 0.164 | 0.209 | 0.226                    | 0.000 | 0.179 | 0.162 | 0.145 | 0.132                  | 0.000 | 0.082 | 0.114 | 0.109 | 0.111                         | 0.106 | 0.104 | 0.092 | 0.075 | 0.042 | 0.000 | 0.040 |
| REHH_2             | 0.000               | 0.089 | 0.199 | 0.270 | 0.401                    | 0.000 | 0.229 | 0.193 | 0.133 | 0.113                  | 0.000 | 0.114 | 0.102 | 0.104 | 0.170                         | 0.243 | 0.066 | 0.058 | 0.050 | 0.029 | 0.000 | 0.043 |
| REHH_20            | 0.000               | 0.271 | 0.594 | 0.769 | 0.866                    | 0.000 | 0.679 | 0.545 | 0.429 | 0.380                  | 0.000 | 0.281 | 0.259 | 0.255 | 0.297                         | 0.412 | 0.250 | 0.226 | 0.202 | 0.121 | 0.000 | 0.185 |
| REHH_200           | 0.000               | 0.131 | 0.240 | 0.340 | 0.340                    | 0.000 | 0.266 | 0.261 | 0.179 | 0.172                  | 0.000 | 0.099 | 0.141 | 0.116 | 0.142                         | 0.117 | 0.139 | 0.153 | 0.119 | 0.090 | 0.000 | 0.089 |
| Tajima's D_21      | 0.000               | 0.201 | 0.562 | 0.840 | 0.934                    | 0.000 | 0.434 | 0.170 | 0.045 | 0.056                  | 0.000 | 0.410 | 0.335 | 0.270 | 0.144                         | 0.049 | 0.077 | 0.067 | 0.057 | 0.033 | 0.000 | 0.040 |
| Tajima's D_41      | 0.000               | 0.257 | 0.640 | 0.895 | 0.964                    | 0.000 | 0.468 | 0.211 | 0.093 | 0.115                  | 0.000 | 0.407 | 0.325 | 0.252 | 0.134                         | 0.101 | 0.140 | 0.117 | 0.097 | 0.052 | 0.000 | 0.060 |
| Tajima's D_101     | 0.000               | 0.354 | 0.728 | 0.936 | 0.981                    | 0.000 | 0.527 | 0.287 | 0.198 | 0.232                  | 0.000 | 0.397 | 0.298 | 0.192 | 0.130                         | 0.219 | 0.257 | 0.206 | 0.166 | 0.084 | 0.000 | 0.086 |
| Tajima's D_201     | 0.000               | 0.446 | 0.786 | 0.953 | 0.988                    | 0.000 | 0.595 | 0.368 | 0.301 | 0.341                  | 0.000 | 0.430 | 0.305 | 0.136 | 0.182                         | 0.330 | 0.367 | 0.282 | 0.217 | 0.105 | 0.000 | 0.099 |
| Fay and Wu's H_21  | 0.000               | 0.122 | 0.324 | 0.500 | 0.616                    | 0.000 | 0.158 | 0.192 | 0.176 | 0.121                  | 0.000 | 0.389 | 0.330 | 0.348 | 0.220                         | 0.101 | 0.097 | 0.080 | 0.066 | 0.033 | 0.000 | 0.039 |
| Fay and Wu's H_41  | 0.000               | 0.173 | 0.373 | 0.554 | 0.650                    | 0.000 | 0.125 | 0.247 | 0.245 | 0.196                  | 0.000 | 0.381 | 0.337 | 0.391 | 0.285                         | 0.176 | 0.179 | 0.140 | 0.111 | 0.054 | 0.000 | 0.059 |
| Fay and Wu's H_101 | 0.000               | 0.292 | 0.457 | 0.633 | 0.721                    | 0.000 | 0.129 | 0.342 | 0.359 | 0.329                  | 0.000 | 0.405 | 0.373 | 0.459 | 0.390                         | 0.313 | 0.322 | 0.234 | 0.183 | 0.084 | 0.000 | 0.077 |
| Fay and Wu's H_201 | 0.000               | 0.401 | 0.537 | 0.692 | 0.770                    | 0.000 | 0.185 | 0.420 | 0.454 | 0.439                  | 0.000 | 0.476 | 0.429 | 0.524 | 0.473                         | 0.424 | 0.438 | 0.300 | 0.231 | 0.103 | 0.000 | 0.087 |

We computed each of the statistics with several window sizes (values after the underscore). For nSL, Tajima's D, and Fay and Wu's H the window size is defined by the number of segregating sites. For iHS, the window size value gives the EHH threshold which sets the limits of integration. For EHH and rEHH the window size corresponds to the recombination rate distance over which the IBS of the haplotypes is judged. Values in the table range from 0 to 1. They correspond to the density of the distribution that does not overlap with the reference distribution. Values in bold and italics fall within the same range as the values obtained when testing nSL. Shaded values are better than those obtained with nSL.

Supplementary Table 4A and 4B. False positive rate for five statistics varying growth rate, bottleneck ratio, migration rate and recombination rate for two different significance levels (0.01 and 0.05).

A)

| p-value=0.01       | Growth rate (Ref=0) |        |        |        |        | Bottleneck ratio (Ref=1) |        |        |        |        | Migration rate (Ref=0) |        |        |        |        | Recombination rate (Ref=2000) |        |        |        |        |        |
|--------------------|---------------------|--------|--------|--------|--------|--------------------------|--------|--------|--------|--------|------------------------|--------|--------|--------|--------|-------------------------------|--------|--------|--------|--------|--------|
|                    | 0                   | 1      | 10     | 100    | 1000   | 1                        | 0.5    | 0.25   | 0.1    | 0.05   | 0                      | 0.001  | 0.01   | 0.1    | 1      | 10                            | 0      | 200    | 400    | 1000   | 2000   |
|                    | nSL_100             | 0.0100 | 0.0148 | 0.0157 | 0.0025 | 0.0001                   | 0.0100 | 0.0098 | 0.0083 | 0.0076 | 0.0081                 | 0.0100 | 0.0067 | 0.0072 | 0.0046 | 0.0046                        | 0.0144 | 0.0090 | 0.0084 | 0.0093 | 0.0100 |
| nSL_200            | 0.0100              | 0.0129 | 0.0113 | 0.0015 | 0.0000 | 0.0100                   | 0.0088 | 0.0071 | 0.0061 | 0.0065 | 0.0100                 | 0.0048 | 0.0056 | 0.0040 | 0.0046 | 0.0120                        | 0.0114 | 0.0101 | 0.0108 | 0.0100 | 0.0093 |
| nSL_500            | 0.0100              | 0.0122 | 0.0106 | 0.0017 | 0.0000 | 0.0100                   | 0.0086 | 0.0071 | 0.0060 | 0.0072 | 0.0100                 | 0.0036 | 0.0047 | 0.0038 | 0.0046 | 0.0107                        | 0.0139 | 0.0118 | 0.0121 | 0.0100 | 0.0092 |
| nSL_1000           | 0.0100              | 0.0120 | 0.0114 | 0.0019 | 0.0000 | 0.0100                   | 0.0093 | 0.0075 | 0.0066 | 0.0080 | 0.0100                 | 0.0045 | 0.0054 | 0.0046 | 0.0052 | 0.0114                        | 0.0130 | 0.0112 | 0.0118 | 0.0100 | 0.0096 |
| nSL_1500           | 0.0100              | 0.0115 | 0.0117 | 0.0025 | 0.0001 | 0.0100                   | 0.0091 | 0.0077 | 0.0067 | 0.0083 | 0.0100                 | 0.0052 | 0.0061 | 0.0051 | 0.0057 | 0.0122                        | 0.0116 | 0.0106 | 0.0111 | 0.0100 | 0.0097 |
| IHS_0.50           | 0.0100              | 0.0061 | 0.0013 | 0.0001 | 0.0000 | 0.0100                   | 0.0059 | 0.0049 | 0.0029 | 0.0017 | 0.0100                 | 0.0038 | 0.0052 | 0.0086 | 0.0095 | 0.0081                        | 0.0185 | 0.0161 | 0.0139 | 0.0100 | 0.0063 |
| IHS_0.25           | 0.0100              | 0.0072 | 0.0025 | 0.0001 | 0.0000 | 0.0100                   | 0.0054 | 0.0032 | 0.0015 | 0.0016 | 0.0100                 | 0.0020 | 0.0028 | 0.0042 | 0.0072 | 0.0111                        | 0.0173 | 0.0171 | 0.0144 | 0.0100 | 0.0060 |
| IHS_0.10           | 0.0100              | 0.0107 | 0.0108 | 0.0021 | 0.0004 | 0.0100                   | 0.0093 | 0.0075 | 0.0055 | 0.0076 | 0.0100                 | 0.0268 | 0.0065 | 0.0100 | 0.0154 | 0.0300                        | 0.0104 | 0.0119 | 0.0109 | 0.0100 | 0.0085 |
| IHS_0.05           | 0.0100              | 0.0116 | 0.0138 | 0.0034 | 0.0007 | 0.0100                   | 0.0106 | 0.0092 | 0.0076 | 0.0107 | 0.0100                 | 0.0280 | 0.0075 | 0.0113 | 0.0159 | 0.0306                        | 0.0091 | 0.0108 | 0.0102 | 0.0100 | 0.0095 |
| EHH_2              | 0.0000              | 0.0000 | 0.0000 | 0.0000 | 0.0000 | 0.0000                   | 0.0000 | 0.0000 | 0.0000 | 0.0000 | 0.0000                 | 0.0000 | 0.0000 | 0.0000 | 0.0000 | 0.0000                        | 0.0000 | 0.0000 | 0.0000 | 0.0000 | 0.0000 |
| EHH_20             | 0.0000              | 0.0000 | 0.0000 | 0.0000 | 0.0000 | 0.0000                   | 0.0000 | 0.0000 | 0.0000 | 0.0000 | 0.0000                 | 0.0000 | 0.0000 | 0.0000 | 0.0000 | 0.0000                        | 0.0000 | 0.0000 | 0.0000 | 0.0000 | 0.0000 |
| EHH_200            | 0.0067              | 0.0048 | 0.0015 | 0.0001 | 0.0000 | 0.0067                   | 0.0029 | 0.0021 | 0.0011 | 0.0010 | 0.0011                 | 0.0002 | 0.0001 | 0.0002 | 0.0002 | 0.0002                        | 0.0116 | 0.0134 | 0.0099 | 0.0067 | 0.0042 |
| REHH_2             | 0.0081              | 0.0120 | 0.0217 | 0.0100 | 0.0066 | 0.0081                   | 0.0131 | 0.0108 | 0.0093 | 0.0161 | 0.0075                 | 0.0133 | 0.0094 | 0.0113 | 0.0244 | 0.0475                        | 0.0075 | 0.0071 | 0.0072 | 0.0081 | 0.0093 |
| REHH_20            | 0.0070              | 0.0127 | 0.0550 | 0.1120 | 0.0528 | 0.0070                   | 0.0167 | 0.0208 | 0.0374 | 0.0836 | 0.0095                 | 0.0368 | 0.0199 | 0.0191 | 0.0220 | 0.0414                        | 0.0055 | 0.0049 | 0.0059 | 0.0070 | 0.0097 |
| REHH_200           | 0.0000              | 0.0000 | 0.0000 | 0.0000 | 0.0000 | 0.0000                   | 0.0000 | 0.0000 | 0.0000 | 0.0000 | 0.0000                 | 0.0000 | 0.0000 | 0.0000 | 0.0000 | 0.0000                        | 0.0000 | 0.0000 | 0.0000 | 0.0000 | 0.0000 |
| Tajima's D_21      | 0.0099              | 0.0129 | 0.0663 | 0.4683 | 0.8677 | 0.0099                   | 0.0087 | 0.0150 | 0.0605 | 0.1914 | 0.0100                 | 0.0023 | 0.0073 | 0.0209 | 0.0056 | 0.0025                        | 0.0168 | 0.0154 | 0.0137 | 0.0099 | 0.0070 |
| Tajima's D_41      | 0.0100              | 0.0134 | 0.0972 | 0.7247 | 0.9873 | 0.0100                   | 0.0075 | 0.0153 | 0.0821 | 0.2969 | 0.0100                 | 0.0010 | 0.0061 | 0.0205 | 0.0031 | 0.0007                        | 0.0242 | 0.0210 | 0.0171 | 0.0100 | 0.0054 |
| Tajima's D_101     | 0.0100              | 0.0170 | 0.2289 | 0.9771 | 1.0000 | 0.0100                   | 0.0057 | 0.0159 | 0.1117 | 0.4306 | 0.0100                 | 0.0005 | 0.0057 | 0.0189 | 0.0007 | 0.0000                        | 0.0442 | 0.0328 | 0.0231 | 0.0100 | 0.0039 |
| Tajima's D_201     | 0.0100              | 0.0226 | 0.4745 | 0.9998 | 1.0000 | 0.0100                   | 0.0045 | 0.0146 | 0.1412 | 0.5241 | 0.0100                 | 0.0006 | 0.0056 | 0.0167 | 0.0001 | 0.0000                        | 0.0677 | 0.0444 | 0.0285 | 0.0100 | 0.0027 |
| Fay and Wu's H_21  | 0.0100              | 0.0032 | 0.0002 | 0.0000 | 0.0000 | 0.0100                   | 0.0097 | 0.0137 | 0.0179 | 0.0121 | 0.0100                 | 0.0590 | 0.0563 | 0.0664 | 0.0221 | 0.0070                        | 0.0125 | 0.0127 | 0.0116 | 0.0100 | 0.0080 |
| Fay and Wu's H_41  | 0.0100              | 0.0023 | 0.0001 | 0.0000 | 0.0000 | 0.0100                   | 0.0089 | 0.0144 | 0.0208 | 0.0139 | 0.0100                 | 0.0581 | 0.0563 | 0.0757 | 0.0179 | 0.0033                        | 0.0178 | 0.0165 | 0.0138 | 0.0100 | 0.0067 |
| Fay and Wu's H_101 | 0.0100              | 0.0012 | 0.0000 | 0.0000 | 0.0000 | 0.0100                   | 0.0074 | 0.0150 | 0.0236 | 0.0140 | 0.0100                 | 0.0318 | 0.0505 | 0.0888 | 0.0087 | 0.0003                        | 0.0299 | 0.0235 | 0.0180 | 0.0100 | 0.0047 |
| Fay and Wu's H_201 | 0.0100              | 0.0007 | 0.0000 | 0.0000 | 0.0000 | 0.0100                   | 0.0066 | 0.0172 | 0.0269 | 0.0117 | 0.0100                 | 0.0249 | 0.0629 | 0.1000 | 0.0032 | 0.0000                        | 0.0496 | 0.0338 | 0.0239 | 0.0100 | 0.0031 |

B)

| p-value=0.05      | Growth rate (Ref=0) |        |        |        |        | Bottleneck ratio (Ref=1) |        |        |        |        | Migration rate (Ref=0) |        |        |        |        | Recombination rate (Ref=2000) |        |        |        |        |        |
|-------------------|---------------------|--------|--------|--------|--------|--------------------------|--------|--------|--------|--------|------------------------|--------|--------|--------|--------|-------------------------------|--------|--------|--------|--------|--------|
|                   | 0                   | 1      | 10     | 100    | 1000   | 1                        | 0.5    | 0.25   | 0.1    | 0.05   | 0                      | 0.001  | 0.01   | 0.1    | 1      | 10                            | 0      | 200    | 400    | 1000   | 2000   |
|                   | nSL_100             | 0.0500 | 0.0612 | 0.0529 | 0.0124 | 0.0009                   | 0.0500 | 0.0416 | 0.0345 | 0.0302 | 0.0322                 | 0.0499 | 0.0264 | 0.0271 | 0.0203 | 0.0292                        | 0.0579 | 0.0509 | 0.0487 | 0.0500 | 0.0500 |
| nSL_200           | 0.0500              | 0.0564 | 0.0459 | 0.0100 | 0.0005 | 0.0500                   | 0.0397 | 0.0333 | 0.0292 | 0.0309 | 0.0500                 | 0.0218 | 0.0236 | 0.0202 | 0.0307 | 0.0535                        | 0.0569 | 0.0538 | 0.0535 | 0.0500 | 0.0441 |
| nSL_500           | 0.0500              | 0.0546 | 0.0486 | 0.0118 | 0.0006 | 0.0500                   | 0.0407 | 0.0349 | 0.0314 | 0.0353 | 0.0500                 | 0.0222 | 0.0245 | 0.0240 | 0.0328 | 0.0543                        | 0.0573 | 0.0554 | 0.0542 | 0.0500 | 0.0448 |
| nSL_1000          | 0.0500              | 0.0558 | 0.0546 | 0.0188 | 0.0021 | 0.0500                   | 0.0431 | 0.0376 | 0.0351 | 0.0421 | 0.0500                 | 0.0249 | 0.0270 | 0.0267 | 0.0344 | 0.0569                        | 0.0561 | 0.0555 | 0.0534 | 0.0500 | 0.0475 |
| nSL_1500          | 0.0500              | 0.0566 | 0.0588 | 0.0237 | 0.0038 | 0.0500                   | 0.0450 | 0.0398 | 0.0384 | 0.0461 | 0.0500                 | 0.0270 | 0.0292 | 0.0288 | 0.0359 | 0.0583                        | 0.0536 | 0.0541 | 0.0518 | 0.0500 | 0.0487 |
| IHS_0.50          | 0.0500              | 0.0356 | 0.0100 | 0.0008 | 0.0001 | 0.0500                   | 0.0313 | 0.0249 | 0.0152 | 0.0090 | 0.0500                 | 0.0162 | 0.0219 | 0.0319 | 0.0424 | 0.0382                        | 0.0798 | 0.0727 | 0.0643 | 0.0500 | 0.0345 |
| IHS_0.25          | 0.0500              | 0.0391 | 0.0148 | 0.0008 | 0.0000 | 0.0500                   | 0.0279 | 0.0193 | 0.0102 | 0.0083 | 0.0500                 | 0.0206 | 0.0204 | 0.0236 | 0.0379 | 0.0517                        | 0.0753 | 0.0737 | 0.0656 | 0.0500 | 0.0331 |
| IHS_0.10          | 0.0500              | 0.0469 | 0.0354 | 0.0086 | 0.0014 | 0.0500                   | 0.0393 | 0.0326 | 0.0255 | 0.0259 | 0.0500                 | 0.0784 | 0.0290 | 0.0378 | 0.0502 | 0.0792                        | 0.0586 | 0.0574 | 0.0551 | 0.0500 | 0.0413 |
| IHS_0.05          | 0.0500              | 0.0493 | 0.0400 | 0.0107 | 0.0017 | 0.0500                   | 0.0422 | 0.0367 | 0.0303 | 0.0310 | 0.0500                 | 0.0806 | 0.0326 | 0.0409 | 0.0513 | 0.0794                        | 0.0548 | 0.0548 | 0.0533 | 0.0500 | 0.0438 |
| EHH_2             | 0.0000              | 0.0000 | 0.0000 | 0.0000 | 0.0000 | 0.0000                   | 0.0000 | 0.0000 | 0.0000 | 0.0000 | 0.0000                 | 0.0000 | 0.0000 | 0.0000 | 0.0000 | 0.0000                        | 0.0000 | 0.0000 | 0.0000 | 0.0000 | 0.0000 |
| EHH_20            | 0.0170              | 0.0108 | 0.0019 | 0.0001 | 0.0000 | 0.0170                   | 0.0047 | 0.0035 | 0.0020 | 0.0008 | 0.0319                 | 0.0052 | 0.0087 | 0.0081 | 0.0066 | 0.0049                        | 0.0319 | 0.0289 | 0.0254 | 0.0170 | 0.0090 |
| EHH_200           | 0.0125              | 0.0083 | 0.0024 | 0.0002 | 0.0000 | 0.0125                   | 0.0049 | 0.0036 | 0.0019 | 0.0014 | 0.0204                 | 0.0047 | 0.0060 | 0.0070 | 0.0060 | 0.0061                        | 0.0204 | 0.0224 | 0.0172 | 0.0125 | 0.0072 |
| REHH_2            | 0.0414              | 0.0520 | 0.0702 | 0.0346 | 0.0231 | 0.0414                   | 0.0526 | 0.0433 | 0.0351 | 0.0490 | 0.0387                 | 0.0437 | 0.0410 | 0.0474 | 0.0833 | 0.1283                        | 0.0387 | 0.0380 | 0.0388 | 0.0414 | 0.0434 |
| REHH_20           | 0.0340              | 0.0486 | 0.1012 | 0.1271 | 0.0531 | 0.0340                   | 0.0507 | 0.0562 | 0.0773 | 0.1244 | 0.0469                 | 0.0754 | 0.0621 | 0.0586 | 0.0624 | 0.0905                        | 0.0296 | 0.0289 | 0.0315 | 0.0340 | 0.0397 |
| REHH_200          | 0.0000              | 0.0000 | 0.0000 | 0.0000 | 0.0000 | 0.0000                   | 0.0000 | 0.0000 | 0.0000 | 0.0000 | 0.0000                 | 0.0000 | 0.0000 | 0.0000 | 0.0000 | 0.0000                        | 0.0000 | 0.0000 | 0.0000 | 0.0000 | 0.0000 |
| Tajima's D_21     | 0.0496              | 0.0755 | 0.3097 | 0.8535 | 0.9893 | 0.0496                   | 0.0448 | 0.0618 | 0.1708 | 0.4323 | 0.0496                 | 0.0194 | 0.0271 | 0.0508 | 0.0290 | 0.0252                        | 0.0599 | 0.0612 | 0.0572 | 0.0496 | 0.0429 |
| Tajima's D_41     | 0.0499              | 0.0820 | 0.4155 | 0.9670 | 0.9998 | 0.0499                   | 0.0424 | 0.0634 | 0.1974 | 0.5037 | 0.0500                 | 0.0123 | 0.0206 | 0.0490 | 0.0228 | 0.0148                        | 0.0723 | 0.0712 | 0.0629 | 0.0499 | 0.0384 |
| Tajima's D_101    | 0.0499              | 0.0982 | 0.6397 | 0.9993 | 1.0000 | 0.0499                   | 0.0369 | 0.0643 | 0.2387 | 0.5846 | 0.0499                 | 0.0042 | 0.0136 | 0.0450 | 0.0110 | 0.0033                        | 0.0972 | 0.0888 | 0.0732 | 0.0499 | 0.0318 |
| Tajima's D_201    | 0.0500              | 0.1225 | 0.8515 | 1.0000 | 1.0000 | 0.0500                   | 0.0315 | 0.0644 | 0.2890 | 0.6839 | 0.0500                 | 0.0019 | 0.0124 | 0.0411 | 0.0039 | 0.0004                        | 0.1243 | 0.1086 | 0.0838 | 0.0500 | 0.0257 |
| Fay and Wu's H_21 | 0.0498              | 0.0213 | 0.0025 | 0.0001 | 0.0000 | 0.0498                   | 0.0551 | 0.0726 | 0.0898 | 0.0614 | 0.0499                 | 0.2736 | 0.2539 | 0.2378 | 0.10   |                               |        |        |        |        |        |

Supplementary Table 5. Areas under the ROC curves.

|                    | s=50  |       |       | s=100 |       |       | s=200 |       |       |
|--------------------|-------|-------|-------|-------|-------|-------|-------|-------|-------|
|                    | g=100 | g=200 | g=500 | g=100 | g=200 | g=500 | g=100 | g=200 | g=500 |
| nSL_100            | 0.451 | 0.460 | 0.458 | 0.454 | 0.469 | 0.477 | 0.470 | 0.484 | 0.471 |
| nSL_200            | 0.744 | 0.684 | 0.607 | 0.896 | 0.820 | 0.674 | 0.985 | 0.959 | 0.812 |
| nSL_500            | 0.750 | 0.690 | 0.607 | 0.904 | 0.828 | 0.680 | 0.988 | 0.965 | 0.819 |
| nSL_1000           | 0.746 | 0.687 | 0.604 | 0.898 | 0.825 | 0.677 | 0.985 | 0.961 | 0.818 |
| nSL_1500           | 0.742 | 0.681 | 0.601 | 0.891 | 0.818 | 0.672 | 0.980 | 0.951 | 0.814 |
| IHS_0.50           | 0.738 | 0.679 | 0.600 | 0.885 | 0.812 | 0.671 | 0.976 | 0.945 | 0.811 |
| IHS_0.25           | 0.697 | 0.651 | 0.570 | 0.829 | 0.766 | 0.639 | 0.952 | 0.910 | 0.757 |
| IHS_0.10           | 0.725 | 0.668 | 0.598 | 0.867 | 0.801 | 0.668 | 0.977 | 0.941 | 0.797 |
| IHS_0.05           | 0.737 | 0.679 | 0.602 | 0.886 | 0.815 | 0.674 | 0.984 | 0.953 | 0.807 |
| EHH_2              | 0.469 | 0.471 | 0.513 | 0.500 | 0.517 | 0.512 | 0.548 | 0.556 | 0.529 |
| EHH_20             | 0.613 | 0.574 | 0.528 | 0.667 | 0.622 | 0.532 | 0.784 | 0.711 | 0.579 |
| Tajima's D_10      | 0.610 | 0.559 | 0.540 | 0.741 | 0.596 | 0.532 | 0.928 | 0.717 | 0.559 |
| Tajima's D_20      | 0.399 | 0.459 | 0.464 | 0.336 | 0.375 | 0.435 | 0.196 | 0.269 | 0.367 |
| Tajima's D_50      | 0.330 | 0.376 | 0.417 | 0.206 | 0.268 | 0.370 | 0.059 | 0.120 | 0.253 |
| Tajima's D_100     | 0.361 | 0.405 | 0.422 | 0.209 | 0.341 | 0.429 | 0.078 | 0.257 | 0.370 |
| Fay and Wu's H_10  | 0.549 | 0.515 | 0.508 | 0.633 | 0.570 | 0.565 | 0.738 | 0.690 | 0.618 |
| Fay and Wu's H_20  | 0.580 | 0.516 | 0.513 | 0.683 | 0.610 | 0.551 | 0.816 | 0.738 | 0.656 |
| Fay and Wu's H_50  | 0.626 | 0.570 | 0.531 | 0.767 | 0.695 | 0.598 | 0.923 | 0.849 | 0.708 |
| Fay and Wu's H_100 | 0.667 | 0.608 | 0.542 | 0.843 | 0.761 | 0.639 | 0.981 | 0.927 | 0.772 |

We show the area under the ROC curve for five statistics (nSL, iHS, EHH, Tajima's D and Fay and Wu's H) under different combinations of selection strength and growth rate ( $s$  and  $g$ , respectively). We computed each of the statistics with several window sizes (values after the underscore). See the footnotes of Supplementary Tables 3 and 4A-4B for explanation on the window size.

Supplementary Table 6A. Top 30 nS<sub>L</sub> outliers (< 1<sup>st</sup> or > 99<sup>th</sup> percentile) for the ASW population.

| Population | SNPid      | chr   | Position(bp) | Derived_Allele | DAF | nS <sub>L</sub> | P-value   | Function       | Gene    |
|------------|------------|-------|--------------|----------------|-----|-----------------|-----------|----------------|---------|
| ASW        | rs17163742 | chr01 | 221395906    | C              | 11  | 5.14            | 1.00E-005 | unknown        | -       |
| ASW        | rs281364   | chr17 | 19730045     | G              | 6   | 5.04            | 1.00E-005 | unknown        | -       |
| ASW        | rs11292    | chr10 | 102303597    | G              | 25  | 4.8             | 1.00E-005 | untranslated-3 | HIF1AN  |
| ASW        | rs10073312 | chr05 | 109249743    | C              | 36  | 4.8             | 1.00E-005 | unknown        | -       |
| ASW        | rs8045580  | chr16 | 22920077     | G              | 12  | 4.72            | 1.00E-005 | unknown        | -       |
| ASW        | rs9788794  | chr16 | 22921536     | T              | 12  | 4.72            | 1.00E-005 | unknown        | -       |
| ASW        | rs12913601 | chr15 | 71861953     | T              | 14  | -4.71           | 1.00E-005 | unknown        | -       |
| ASW        | rs4850505  | chr02 | 194561636    | G              | 12  | 4.62            | 1.00E-005 | unknown        | -       |
| ASW        | rs7778364  | chr07 | 32364158     | C              | 11  | 4.61            | 1.00E-005 | unknown        | -       |
| ASW        | rs1440101  | chr15 | 72011684     | G              | 83  | 4.61            | 1.00E-005 | intron         | LOXL1   |
| ASW        | rs12832115 | chr12 | 112326305    | C              | 14  | 4.6             | 1.00E-005 | near-gene-5    | -       |
| ASW        | rs2489043  | chr10 | 102324317    | C              | 30  | 4.59            | 1.00E-005 | unknown        | -       |
| ASW        | rs12902790 | chr15 | 71955281     | C              | 79  | 4.57            | 1.00E-005 | intron         | TBC1D21 |
| ASW        | rs9850102  | chr03 | 48541782     | T              | 6   | 4.57            | 1.00E-005 | intron         | PFKFB4  |
| ASW        | rs4937385  | chr11 | 110149742    | C              | 42  | 4.56            | 1.00E-005 | unknown        | -       |
| ASW        | rs2034377  | chr02 | 223648307    | C              | 39  | 4.52            | 1.00E-005 | unknown        | -       |
| ASW        | rs2088762  | chr19 | 21349675     | C              | 30  | 4.52            | 1.00E-005 | unknown        | ZNF738  |
| ASW        | rs16897662 | chr08 | 100835696    | G              | 19  | 4.52            | 1.00E-005 | intron         | VPS13B  |
| ASW        | rs2209797  | chr09 | 19581691     | G              | 6   | 4.51            | 1.00E-005 | intron         | SLC24A2 |
| ASW        | rs10504836 | chr08 | 88669709     | C              | 7   | 4.5             | 1.00E-005 | unknown        | -       |
| ASW        | rs7833870  | chr08 | 100860332    | C              | 19  | 4.49            | 1.00E-005 | missense       | VPS13B  |
| ASW        | rs2012013  | chr19 | 21333646     | T              | 30  | 4.48            | 1.00E-005 | unknown        | ZNF738  |
| ASW        | rs11049953 | chr12 | 29002747     | C              | 6   | 4.44            | 1.00E-005 | unknown        | -       |
| ASW        | rs1440102  | chr15 | 72029039     | A              | 15  | -4.43           | 1.00E-005 | intron         | LOXL1   |
| ASW        | rs489913   | chr15 | 71432872     | C              | 13  | -4.41           | 1.00E-005 | intron         | HCN4    |
| ASW        | rs16971703 | chr15 | 72243676     | C              | 14  | -4.41           | 1.00E-005 | unknown        | -       |
| ASW        | rs16953384 | chr15 | 67558675     | C              | 6   | 4.39            | 1.00E-005 | unknown        | -       |
| ASW        | rs7650727  | chr03 | 101171666    | C              | 52  | 4.38            | 1.00E-005 | intron         | FILIP1L |
| ASW        | rs1452383  | chr15 | 71932107     | A              | 19  | -4.38           | 1.00E-005 | unknown        | -       |



Supplementary Table 6B. Top 30 nS<sub>L</sub> outliers (< 1<sup>st</sup> or > 99<sup>th</sup> percentile) for the CEU population.

| Population | SNPId      | chr   | Possition(bp) | Derived_Allele | DAF | nS <sub>L</sub> | P-value   | Function    | Gene    |
|------------|------------|-------|---------------|----------------|-----|-----------------|-----------|-------------|---------|
| CEU        | rs4954555  | chr02 | 136509584     | T              | 93  | -5.74           | 1.00E-005 | unknown     | -       |
| CEU        | rs7371606  | chr02 | 136523244     | G              | 25  | 5.71            | 1.00E-005 | unknown     | -       |
| CEU        | rs12475139 | chr02 | 136503121     | A              | 23  | 5.69            | 1.00E-005 | unknown     | -       |
| CEU        | rs13404551 | chr02 | 136438465     | C              | 21  | 5.62            | 1.00E-005 | intron      | DARS    |
| CEU        | rs313528   | chr02 | 136162339     | A              | 21  | 5.56            | 1.00E-005 | intron      | R3HDM1  |
| CEU        | rs1446584  | chr02 | 136136431     | G              | 20  | 5.47            | 1.00E-005 | intron      | R3HDM1  |
| CEU        | rs4954566  | chr02 | 136617983     | T              | 29  | 5.46            | 1.00E-005 | unknown     | -       |
| CEU        | rs4954388  | chr02 | 136524612     | C              | 23  | 5.42            | 1.00E-005 | unknown     | -       |
| CEU        | rs4954557  | chr02 | 136521871     | T              | 23  | 5.42            | 1.00E-005 | unknown     | -       |
| CEU        | rs953387   | chr02 | 136623640     | C              | 29  | 5.33            | 1.00E-005 | unknown     | -       |
| CEU        | rs6715785  | chr02 | 136626743     | A              | 29  | 5.33            | 1.00E-005 | unknown     | -       |
| CEU        | rs10484008 | chr14 | 88446316      | G              | 2   | 5.25            | 0.000158  | unknown     | -       |
| CEU        | rs7752195  | chr06 | 25527073      | T              | 8   | -5.23           | 1.00E-005 | intron      | LRRC16A |
| CEU        | rs7774567  | chr06 | 25533505      | A              | 8   | -5.17           | 1.00E-005 | intron      | LRRC16A |
| CEU        | rs666614   | chr02 | 135006923     | C              | 50  | 5.11            | 1.00E-005 | intron      | TMEM163 |
| CEU        | rs655472   | chr02 | 135006691     | C              | 50  | 5.05            | 1.00E-005 | intron      | TMEM163 |
| CEU        | rs9295661  | chr06 | 25558005      | C              | 8   | -5.04           | 1.00E-005 | intron      | LRRC16A |
| CEU        | rs10193587 | chr02 | 136641909     | C              | 27  | 4.98            | 1.00E-005 | unknown     | -       |
| CEU        | rs2090660  | chr02 | 136535189     | T              | 20  | 4.97            | 1.00E-005 | unknown     | -       |
| CEU        | rs749873   | chr02 | 136533558     | T              | 70  | -4.87           | 1.00E-005 | unknown     | -       |
| CEU        | rs7568884  | chr02 | 136644790     | T              | 26  | 4.85            | 1.00E-005 | unknown     | -       |
| CEU        | rs4954573  | chr02 | 136643564     | G              | 26  | 4.85            | 1.00E-005 | unknown     | -       |
| CEU        | rs12631710 | chr03 | 125123110     | T              | 1   | 4.82            | 1.00E-005 | intron      | CCDC14  |
| CEU        | rs1533649  | chr02 | 136530579     | A              | 19  | 4.81            | 1.00E-005 | unknown     | -       |
| CEU        | rs4523477  | chr01 | 73249037      | G              | 1   | 4.8             | 1.00E-005 | unknown     | -       |
| CEU        | rs2230591  | chr03 | 49911630      | A              | 1   | 4.79            | 1.00E-005 | missense    | MST1R   |
| CEU        | rs1592     | chr02 | 135438613     | C              | 39  | 4.79            | 1.00E-005 | near-gene-3 | -       |
| CEU        | rs1399859  | chr08 | 53076300      | A              | 17  | 4.79            | 1.00E-005 | unknown     | -       |
| CEU        | rs1399857  | chr08 | 53076461      | G              | 17  | 4.79            | 1.00E-005 | unknown     | -       |
| CEU        | rs6473675  | chr08 | 53077062      | T              | 17  | 4.79            | 1.00E-005 | unknown     | -       |

Supplementary Table 6C. Top 30 nS<sub>L</sub> outliers (< 1<sup>st</sup> or > 99<sup>th</sup> percentile) for the CHB population.

| Population | SNPId      | chr   | Position(bp) | Derived_Allele | DAF | nS <sub>L</sub> | P-value   | Function       | Gene      |
|------------|------------|-------|--------------|----------------|-----|-----------------|-----------|----------------|-----------|
| CHB        | rs260705   | chr02 | 108937872    | G              | 2   | 6.32            | 1.60E-005 | intron         | EDAR      |
| CHB        | rs6934645  | chr06 | 33014206     | A              | 4   | -5.2            | 0.025119  | unknown        | HLA-DMB   |
| CHB        | rs12206377 | chr06 | 33017313     | G              | 4   | -5.2            | 0.025119  | unknown        | -         |
| CHB        | rs9848674  | chr03 | 108884573    | C              | 5   | 5.18            | 0.000631  | intron         | BBX       |
| CHB        | rs13159615 | chr05 | 144139852    | T              | 2   | 5.15            | 2.00E-004 | unknown        | -         |
| CHB        | rs9267785  | chr06 | 32032848     | T              | 5   | -5.01           | 0.039811  | unknown        | RDBP      |
| CHB        | rs7598552  | chr02 | 108306502    | C              | 5   | 5.01            | 0.001     | intron         | SULT1C2P1 |
| CHB        | rs1879493  | chr02 | 108304920    | C              | 5   | 5               | 0.001     | near-gene-5    | -         |
| CHB        | rs10209570 | chr02 | 108610389    | T              | 4   | 4.99            | 0.000794  | intron         | -         |
| CHB        | rs1821867  | chr02 | 108577286    | C              | 4   | 4.97            | 0.000631  | intron         | -         |
| CHB        | rs9819988  | chr03 | 137107260    | C              | 2   | 4.91            | 0.000316  | unknown        | -         |
| CHB        | rs7084981  | chr10 | 94959756     | T              | 5   | 4.85            | 0.001     | unknown        | -         |
| CHB        | rs28366175 | chr06 | 32377556     | C              | 5   | -4.82           | 0.050119  | unknown        | C6orf10   |
| CHB        | rs9267661  | chr06 | 31968555     | T              | 5   | -4.82           | 0.050119  | unknown        | EHMT2     |
| CHB        | rs2844648  | chr06 | 31016693     | C              | 7   | -4.79           | 6.30E-005 | unknown        | -         |
| CHB        | rs13413437 | chr02 | 108564962    | C              | 95  | -4.78           | 0.000126  | unknown        | -         |
| CHB        | rs6498703  | chr16 | 17410330     | A              | 7   | 4.77            | 1.00E-005 | intron         | XYLT1     |
| CHB        | rs12477830 | chr02 | 108305167    | G              | 93  | -4.76           | 1.00E-005 | untranslated-5 | SULT1C2P1 |
| CHB        | rs17269356 | chr02 | 108371267    | C              | 5   | 4.76            | 0.001     | unknown        | -         |
| CHB        | rs12476238 | chr02 | 108306768    | C              | 93  | -4.75           | 1.00E-005 | intron         | SULT1C2P1 |
| CHB        | rs1589912  | chr02 | 108690108    | A              | 5   | 4.74            | 0.001     | unknown        | -         |
| CHB        | rs4781986  | chr16 | 17403825     | C              | 10  | 4.74            | 1.00E-005 | intron         | XYLT1     |
| CHB        | rs4244304  | chr10 | 94926318     | C              | 10  | 4.73            | 1.00E-005 | unknown        | -         |
| CHB        | rs6716426  | chr02 | 108680810    | G              | 95  | -4.72           | 0.000158  | unknown        | -         |
| CHB        | rs1907965  | chr09 | 71703060     | G              | 2   | 4.72            | 0.000398  | intron         | C9orf135  |
| CHB        | rs2247178  | chr06 | 31024697     | A              | 7   | -4.7            | 1.00E-004 | unknown        | DPCR1     |
| CHB        | rs10179602 | chr02 | 108451805    | G              | 94  | -4.7            | 0.000158  | intron         | GCC2      |
| CHB        | rs12438318 | chr15 | 29467737     | A              | 17  | -4.68           | 1.00E-005 | unknown        | -         |
| CHB        | rs1973360  | chr03 | 168999542    | C              | 3   | 4.66            | 0.000501  | intron         | SERPINI1  |
| CHB        | rs12469016 | chr02 | 108622967    | G              | 95  | -4.65           | 0.000158  | intron         | -         |

Supplementary Table 6D. Top 30  $nS_L$  outliers (< 1<sup>st</sup> or > 99<sup>th</sup> percentile) for the CHD population.

| Population | SNPid      | chr   | Possition(bp) | Derived_Allele | DAF | $nS_L$ | P-value   | Function       | Gene    |
|------------|------------|-------|---------------|----------------|-----|--------|-----------|----------------|---------|
| CHD        | rs3800316  | chr06 | 27364081      | A              | 97  | -5.5   | 1.00E-005 | unknown        | -       |
| CHD        | rs12613021 | chr02 | 177530870     | C              | 3   | 5.44   | 0.000251  | unknown        | -       |
| CHD        | rs6835296  | chr04 | 143674737     | C              | 3   | 5.29   | 0.000316  | intron         | INPP4B  |
| CHD        | rs10209570 | chr02 | 108610389     | T              | 2   | 5.2    | 0.000126  | intron         | -       |
| CHD        | rs911186   | chr06 | 27258578      | G              | 2   | 5.08   | 0.000158  | unknown        | -       |
| CHD        | rs10851487 | chr15 | 29128753      | G              | 4   | 4.84   | 0.001     | intron         | TRPM1   |
| CHD        | rs2854050  | chr06 | 32293583      | A              | 18  | -4.82  | 1.00E-005 | unknown        | NOTCH4  |
| CHD        | rs9848674  | chr03 | 108884573     | C              | 6   | 4.8    | 1.00E-005 | intron         | BBX     |
| CHD        | rs4564548  | chr16 | 17352536      | C              | 11  | 4.7    | 1.00E-005 | intron         | XYLT1   |
| CHD        | rs11130186 | chr03 | 49250832      | A              | 1   | 4.68   | 1.00E-005 | intron         | CCDC36  |
| CHD        | rs9357105  | chr06 | 31111902      | A              | 10  | -4.65  | 0.000316  | unknown        | -       |
| CHD        | rs9851055  | chr03 | 108777698     | T              | 8   | 4.62   | 1.00E-005 | intron         | BBX     |
| CHD        | rs1478894  | chr08 | 11486163      | C              | 8   | 4.57   | 1.00E-005 | unknown        | -       |
| CHD        | rs4781986  | chr16 | 17403825      | C              | 4   | 4.57   | 0.001259  | intron         | XYLT1   |
| CHD        | rs7168200  | chr15 | 63009811      | T              | 34  | 4.55   | 1.00E-005 | intron         | ANKDD1A |
| CHD        | rs745767   | chr02 | 177533661     | A              | 97  | -4.55  | 1.00E-004 | unknown        | -       |
| CHD        | rs631400   | chr03 | 108820670     | C              | 7   | 4.55   | 1.00E-005 | intron         | BBX     |
| CHD        | rs6900560  | chr06 | 106035880     | A              | 3   | 4.51   | 0.001     | unknown        | -       |
| CHD        | rs13281098 | chr08 | 9316963       | A              | 2   | 4.51   | 0.000398  | unknown        | -       |
| CHD        | rs3731640  | chr02 | 26006297      | G              | 8   | 4.49   | 1.00E-005 | intron         | KIF3C   |
| CHD        | rs7570544  | chr02 | 108214569     | G              | 30  | 4.48   | 1.00E-005 | unknown        | -       |
| CHD        | rs2966     | chr06 | 33797498      | C              | 10  | 4.48   | 1.00E-005 | untranslated-3 | IP6K3   |
| CHD        | rs2856437  | chr06 | 32265342      | A              | 18  | -4.47  | 1.00E-005 | unknown        | PBX2    |
| CHD        | rs482542   | chr01 | 164871465     | G              | 2   | 4.47   | 0.000501  | unknown        | -       |
| CHD        | rs329921   | chr03 | 108872594     | C              | 5   | 4.47   | 0.001585  | intron         | BBX     |
| CHD        | rs12915207 | chr15 | 47938432      | G              | 2   | 4.47   | 0.000501  | untranslated-3 | ATP8B4  |
| CHD        | rs9480564  | chr06 | 106015864     | C              | 2   | 4.46   | 0.000501  | unknown        | -       |
| CHD        | rs2072134  | chr12 | 111893559     | A              | 18  | -4.45  | 1.00E-005 | untranslated-3 | OAS3    |
| CHD        | rs12148990 | chr16 | 17369496      | A              | 7   | 4.43   | 1.00E-005 | intron         | XYLT1   |
| CHD        | rs855004   | chr02 | 108133378     | G              | 20  | 4.4    | 1.00E-005 | unknown        | -       |

Supplementary Table 6E. Top 30 nS<sub>L</sub> outliers (< 1<sup>st</sup> or > 99<sup>th</sup> percentile) for the GIH population.

| Population | SNPid      | chr   | Position(bp) | Derived_Allele | DAF | nS <sub>L</sub> | P-value | Function     | Gene        |
|------------|------------|-------|--------------|----------------|-----|-----------------|---------|--------------|-------------|
| GIH        | rs2185770  | chr06 | 73806676     | G              | 10  | 5.4             | 1       | intron       | KCNQ5       |
| GIH        | rs4730954  | chr07 | 119704394    | G              | 5   | 5.37            | 1       | intron       | KCND2       |
| GIH        | rs12533932 | chr07 | 119727006    | G              | 5   | 5.29            | 1       | intron       | KCND2       |
| GIH        | rs3817874  | chr22 | 45100920     | G              | 6   | 5.18            | 1       | intron       | GTSE1       |
| GIH        | rs9267487  | chr06 | 31619329     | C              | 14  | -5.09           | 1       | unknown      | P6V1G2-DDX3 |
| GIH        | rs28780106 | chr06 | 30559494     | A              | 23  | -5.05           | 1       | unknown      | -           |
| GIH        | rs10819113 | chr09 | 127884913    | A              | 11  | -5.04           | 1       | unknown      | -           |
| GIH        | rs10241520 | chr07 | 119644092    | A              | 92  | -5.02           | 1       | unknown      | -           |
| GIH        | rs28732144 | chr06 | 31664184     | A              | 14  | -5.01           | 1       | unknown      | LST1        |
| GIH        | rs2190184  | chr07 | 119601105    | C              | 93  | -4.95           | 1       | unknown      | -           |
| GIH        | rs9654068  | chr04 | 41727723     | G              | 16  | 4.94            | 1       | intron       | SLC30A9     |
| GIH        | rs9291209  | chr04 | 41727910     | T              | 16  | 4.94            | 1       | intron       | SLC30A9     |
| GIH        | rs10134470 | chr14 | 96663134     | T              | 4   | -4.91           | 1       | unknown      | -           |
| GIH        | rs4044210  | chr22 | 45164979     | C              | 11  | 4.86            | 1       | missense     | CELSR1      |
| GIH        | rs7672382  | chr04 | 41869567     | G              | 14  | 4.85            | 1       | unknown      | -           |
| GIH        | rs3093662  | chr06 | 31652168     | G              | 14  | -4.81           | 1       | unknown      | TNF         |
| GIH        | rs13107768 | chr04 | 41719739     | A              | 16  | 4.76            | 1       | intron       | SLC30A9     |
| GIH        | rs11105028 | chr12 | 87644447     | G              | 4   | 4.73            | 1       | unknown      | -           |
| GIH        | rs17475879 | chr06 | 30472487     | T              | 22  | -4.73           | 1       | unknown      | -           |
| GIH        | rs755407   | chr09 | 125330375    | T              | 26  | 4.72            | 1       | intron       | DENND1A     |
| GIH        | rs7290972  | chr22 | 45174187     | C              | 7   | 4.72            | 1       | intron       | CELSR1      |
| GIH        | rs3132689  | chr06 | 29990509     | G              | 24  | -4.7            | 1       | intron       | -           |
| GIH        | rs11743225 | chr05 | 117590170    | A              | 22  | 4.68            | 1       | unknown      | -           |
| GIH        | rs2581442  | chr04 | 41706570     | T              | 16  | 4.68            | 1       | intron       | SLC30A9     |
| GIH        | rs15857    | chr04 | 41717221     | C              | 16  | 4.68            | 1       | coding-synon | SLC30A9     |
| GIH        | rs6813397  | chr04 | 41879586     | G              | 14  | 4.65            | 1       | unknown      | -           |
| GIH        | rs7857782  | chr09 | 125381131    | G              | 20  | 4.64            | 1       | intron       | DENND1A     |
| GIH        | rs1155818  | chr02 | 223608748    | T              | 15  | 4.64            | 1       | unknown      | -           |
| GIH        | rs10953916 | chr07 | 119886649    | A              | 4   | 4.63            | 1       | intron       | KCND2       |
| GIH        | rs4355757  | chr08 | 67083278     | T              | 14  | 4.61            | 1       | unknown      | -           |

Supplementary Table 6F. Top 30 n<sub>S</sub>L outliers (< 1<sup>st</sup> or > 99<sup>th</sup> percentile) for the JPT population.

| Population | SNPId      | chr   | Possition(bp) | Derived_Allele | DAF | n <sub>S</sub> L | P-value   | Function       | Gene    |
|------------|------------|-------|---------------|----------------|-----|------------------|-----------|----------------|---------|
| JPT        | rs17356524 | chr06 | 36370905      | T              | 5   | -6.21            | 0.000251  | intron         | PNPLA1  |
| JPT        | rs12724767 | chr01 | 172515247     | T              | 2   | 5.79             | 7.90E-005 | intron         | -       |
| JPT        | rs6088116  | chr20 | 31178498      | G              | 2   | 5.71             | 1.00E-004 | unknown        | -       |
| JPT        | rs1442493  | chr04 | 100540388     | G              | 23  | 5.57             | 1.00E-005 | unknown        | -       |
| JPT        | rs16869677 | chr06 | 33984060      | T              | 13  | -5.47            | 1.00E-005 | unknown        | -       |
| JPT        | rs6912480  | chr06 | 36737495      | C              | 6   | -5.45            | 1.00E-005 | unknown        | -       |
| JPT        | rs1535938  | chr06 | 33959945      | T              | 12  | -5.44            | 1.00E-005 | unknown        | -       |
| JPT        | rs12197499 | chr06 | 36322469      | G              | 95  | 5.34             | 0.000251  | intron         | -       |
| JPT        | rs9469625  | chr06 | 33989548      | A              | 13  | -5.3             | 1.00E-005 | unknown        | -       |
| JPT        | rs12191571 | chr06 | 33988458      | T              | 87  | 5.29             | 1.00E-005 | unknown        | -       |
| JPT        | rs27848    | chr16 | 64438881      | C              | 6   | 5.24             | 1.00E-005 | unknown        | -       |
| JPT        | rs1110528  | chr16 | 64436948      | G              | 6   | 5.2              | 1.00E-005 | unknown        | -       |
| JPT        | rs3128376  | chr07 | 111916569     | A              | 2   | 5.15             | 0.000251  | intron         | C7orf53 |
| JPT        | rs284789   | chr04 | 100551080     | A              | 23  | 5.15             | 1.00E-005 | unknown        | -       |
| JPT        | rs13196184 | chr06 | 36314060      | T              | 5   | -5.14            | 0.025119  | unknown        | -       |
| JPT        | rs9296177  | chr06 | 36305720      | C              | 5   | -5.08            | 0.025119  | intron         | BRPF3   |
| JPT        | rs7747793  | chr06 | 36304140      | A              | 5   | -5.05            | 0.031623  | intron         | BRPF3   |
| JPT        | rs6921746  | chr06 | 36817874      | A              | 8   | -5.03            | 1.60E-005 | untranslated-3 | CPNE5   |
| JPT        | rs2032506  | chr06 | 36300204      | T              | 5   | -5.03            | 0.031623  | intron         | BRPF3   |
| JPT        | rs4236048  | chr06 | 36299305      | C              | 5   | -5.03            | 0.031623  | intron         | BRPF3   |
| JPT        | rs3822969  | chr06 | 36828736      | A              | 8   | -5.01            | 2.00E-005 | intron         | CPNE5   |
| JPT        | rs921656   | chr02 | 108253437     | A              | 20  | 4.98             | 1.00E-005 | unknown        | -       |
| JPT        | rs921659   | chr02 | 108253651     | C              | 20  | 4.98             | 1.00E-005 | unknown        | -       |
| JPT        | rs929056   | chr06 | 36829606      | T              | 92  | 4.96             | 1.00E-005 | intron         | CPNE5   |
| JPT        | rs11939328 | chr04 | 99922259      | A              | 19  | 4.96             | 1.00E-005 | unknown        | -       |
| JPT        | rs16889362 | chr06 | 37073683      | A              | 8   | -4.9             | 2.50E-005 | unknown        | -       |
| JPT        | rs16889370 | chr06 | 37076041      | A              | 8   | -4.89            | 3.20E-005 | unknown        | -       |
| JPT        | rs4241191  | chr02 | 197190452     | T              | 2   | 4.87             | 0.000398  | unknown        | -       |
| JPT        | rs4785862  | chr16 | 64398663      | C              | 6   | 4.85             | 0.001259  | unknown        | -       |
| JPT        | rs957644   | chr01 | 163882781     | T              | 3   | 4.83             | 0.000501  | intron         | MGST3   |

Supplementary Table 6G. Top 30 nS<sub>L</sub> outliers (< 1<sup>st</sup> or > 99<sup>th</sup> percentile) for the LWK population.

| Population | SNPId      | chr   | Possition(bp) | Derived_Allele | DAF | nS <sub>L</sub> | P-value   | Function | Gene      |
|------------|------------|-------|---------------|----------------|-----|-----------------|-----------|----------|-----------|
| LWK        | rs3763341  | chr06 | 33086998      | G              | 76  | 4.98            | 1.00E-005 | unknown  | -         |
| LWK        | rs10248243 | chr07 | 47478639      | C              | 22  | -4.93           | 1.00E-005 | intron   | TNS3      |
| LWK        | rs10947368 | chr06 | 33083319      | T              | 22  | -4.91           | 1.00E-005 | unknown  | HLA-DOA   |
| LWK        | rs12702428 | chr07 | 48072734      | G              | 15  | -4.81           | 1.00E-005 | unknown  | -         |
| LWK        | rs7594789  | chr02 | 12534521      | A              | 13  | -4.8            | 1.00E-005 | unknown  | -         |
| LWK        | rs10891158 | chr11 | 110037558     | T              | 17  | 4.77            | 1.00E-005 | intron   | ARHGAP2-  |
| LWK        | rs12692469 | chr02 | 12221064      | C              | 33  | 4.74            | 1.00E-005 | unknown  | -         |
| LWK        | rs17172879 | chr07 | 47593038      | T              | 26  | -4.72           | 1.00E-005 | unknown  | -         |
| LWK        | rs3129304  | chr06 | 33081721      | C              | 24  | -4.7            | 1.00E-005 | unknown  | HLA-DOA   |
| LWK        | rs3129303  | chr06 | 33081856      | C              | 24  | -4.7            | 1.00E-005 | unknown  | HLA-DOA   |
| LWK        | rs2116263  | chr06 | 33133471      | A              | 22  | -4.69           | 1.00E-005 | unknown  | -         |
| LWK        | rs9394174  | chr06 | 33939650      | T              | 18  | -4.68           | 1.00E-005 | unknown  | -         |
| LWK        | rs4937385  | chr11 | 110149742     | C              | 28  | 4.67            | 1.00E-005 | unknown  | -         |
| LWK        | rs6006743  | chr22 | 44184187      | G              | 17  | 4.65            | 1.00E-005 | intron   | SMC1B     |
| LWK        | rs12282038 | chr11 | 109994124     | G              | 22  | 4.63            | 1.00E-005 | intron   | ARHGAP2-  |
| LWK        | rs943472   | chr06 | 33846420      | C              | 67  | 4.63            | 1.00E-005 | unknown  | -         |
| LWK        | rs16881634 | chr07 | 47899539      | C              | 83  | 4.6             | 1.00E-005 | intron   | PKD1L1    |
| LWK        | rs17131915 | chr07 | 47900019      | C              | 83  | 4.59            | 1.00E-005 | missense | PKD1L1    |
| LWK        | rs1997125  | chr07 | 48208860      | G              | 13  | -4.56           | 1.00E-005 | intron   | ABCA13    |
| LWK        | rs364950   | chr06 | 33083874      | A              | 61  | 4.53            | 1.00E-005 | unknown  | HLA-DOA   |
| LWK        | rs4551215  | chr06 | 33133678      | T              | 23  | -4.53           | 1.00E-005 | unknown  | -         |
| LWK        | rs444821   | chr06 | 33112913      | T              | 62  | 4.51            | 1.00E-005 | unknown  | -         |
| LWK        | rs226118   | chr11 | 110167354     | T              | 22  | 4.5             | 1.00E-005 | unknown  | -         |
| LWK        | rs6925399  | chr06 | 33610996      | C              | 30  | -4.5            | 1.00E-005 | unknown  | -         |
| LWK        | rs12192605 | chr06 | 133463185     | C              | 8   | -4.47           | 1.00E-005 | unknown  | LOC285735 |
| LWK        | rs6819958  | chr04 | 100879932     | T              | 14  | -4.45           | 1.00E-005 | unknown  | -         |
| LWK        | rs4312417  | chr19 | 43489029      | A              | 66  | -4.45           | 1.00E-005 | intron   | YIF1B     |
| LWK        | rs721797   | chr07 | 47638125      | G              | 28  | -4.4            | 1.00E-005 | unknown  | -         |
| LWK        | rs6908509  | chr06 | 33408249      | T              | 24  | -4.39           | 1.00E-005 | intron   | -         |
| LWK        | rs2077943  | chr11 | 110043499     | C              | 28  | 4.39            | 1.00E-005 | intron   | ARHGAP2-  |

Supplementary Table 6H. Top 30  $nS_L$  outliers (< 1<sup>st</sup> or > 99<sup>th</sup> percentile) for the MEX population.

| Population | SNPId      | chr   | Possition(bp) | Derived_Allele | DAF | $nS_L$ | P-value   | Function           | Gene    |
|------------|------------|-------|---------------|----------------|-----|--------|-----------|--------------------|---------|
| MEX        | rs7290972  | chr22 | 45174187      | C              | 14  | 5.59   | 1.00E-005 | intron             | CELSR1  |
| MEX        | rs4744175  | chr09 | 94909547      | G              | 30  | 5.25   | 1.00E-005 | intron             | C9orf89 |
| MEX        | rs7141605  | chr14 | 62950199      | G              | 9   | 5.09   | 0.000794  | intron             | PPP2R5E |
| MEX        | rs1255627  | chr14 | 63035697      | G              | 11  | 5.08   | 0.001259  | intron             | PPP2R5E |
| MEX        | rs10992629 | chr09 | 94894265      | G              | 16  | 4.91   | 1.00E-005 | unknown            | -       |
| MEX        | rs11104982 | chr12 | 87571073      | T              | 5   | 4.88   | 0.000126  | unknown            | -       |
| MEX        | rs4044210  | chr22 | 45164979      | C              | 13  | 4.75   | 0.001585  | missense           | CELSR1  |
| MEX        | rs1797022  | chr20 | 24000857      | G              | 14  | 4.65   | 1.00E-005 | unknown            | -       |
| MEX        | rs1271559  | chr14 | 62854512      | G              | 11  | 4.61   | 0.001995  | near-gene-5        | -       |
| MEX        | rs907076   | chr09 | 15433430      | C              | 13  | 4.56   | 0.001995  | intron             | SNAPC3  |
| MEX        | rs10878563 | chr12 | 65796686      | G              | 11  | 4.55   | 0.001995  | unknown            | -       |
| MEX        | rs953493   | chr12 | 38572369      | C              | 28  | -4.54  | 1.00E-005 | intron             | SLC2A13 |
| MEX        | rs4309576  | chr02 | 152320491     | G              | 20  | 4.53   | 1.00E-005 | unknown            | -       |
| MEX        | rs9836399  | chr03 | 123294501     | A              | 23  | 4.53   | 1.00E-005 | intron             | CD86    |
| MEX        | rs1149294  | chr06 | 105758864     | C              | 10  | 4.49   | 0.001995  | unknown            | -       |
| MEX        | rs3817874  | chr22 | 45100920      | G              | 14  | 4.49   | 1.00E-005 | intron             | GTSE1   |
| MEX        | rs4664502  | chr02 | 152306061     | G              | 20  | 4.49   | 1.00E-005 | unknown            | -       |
| MEX        | rs2115766  | chr05 | 97076919      | G              | 5   | 4.48   | 0.000316  | unknown            | -       |
| MEX        | rs17559800 | chr12 | 38588213      | G              | 28  | -4.47  | 1.00E-005 | intron             | SLC2A13 |
| MEX        | rs6482215  | chr10 | 22780705      | A              | 9   | 4.45   | 0.001585  | unknown            | -       |
| MEX        | rs11564258 | chr12 | 39078567      | G              | 78  | 4.43   | 1.00E-005 | unknown            | -       |
| MEX        | rs669759   | chr02 | 135007605     | C              | 18  | -4.43  | 1.00E-005 | intron             | TMEM163 |
| MEX        | rs10089519 | chr08 | 129601300     | A              | 26  | 4.39   | 1.00E-005 | unknown            | -       |
| MEX        | rs771205   | chr01 | 149241732     | T              | 6   | 4.38   | 0.001     | 5'UTR,untranslated | FAM63A  |
| MEX        | rs12423682 | chr12 | 38614682      | T              | 28  | -4.36  | 1.00E-005 | intron             | SLC2A13 |
| MEX        | rs17042744 | chr02 | 21678327      | G              | 10  | 4.36   | 0.001995  | unknown            | -       |
| MEX        | rs535458   | chr12 | 38651650      | A              | 28  | -4.36  | 1.00E-005 | intron             | SLC2A13 |
| MEX        | rs17111530 | chr14 | 80668665      | C              | 10  | 4.36   | 0.001995  | intron             | TSHR    |
| MEX        | rs9831425  | chr03 | 157722406     | T              | 25  | 4.36   | 1.00E-005 | intron             | KCNAB1  |



Supplementary Table 6I. Top 30 n<sub>S</sub>L outliers (< 1<sup>st</sup> or > 99<sup>th</sup> percentile) for the MKK population.

| Population | SNPid      | chr   | Position(bp) | Derived_Allele | DAF | n <sub>S</sub> L | P-value   | Function       | Gene    |
|------------|------------|-------|--------------|----------------|-----|------------------|-----------|----------------|---------|
| MKK        | rs16831455 | chr02 | 135690238    | G              | 16  | 6.63             | 1.00E-005 | intron         | ZRANB3  |
| MKK        | rs309154   | chr02 | 136443037    | C              | 25  | 6.24             | 1.00E-005 | intron         | DARS    |
| MKK        | rs6752874  | chr02 | 134621845    | C              | 70  | 6.17             | 1.00E-005 | unknown        | -       |
| MKK        | rs16838134 | chr02 | 137595057    | C              | 22  | -6.12            | 1.00E-005 | intron         | THSD7B  |
| MKK        | rs13390171 | chr02 | 135493974    | A              | 25  | 5.97             | 1.00E-005 | intron         | YSK4    |
| MKK        | rs6430516  | chr02 | 134935075    | G              | 29  | 5.89             | 1.00E-005 | intron         | TMEM163 |
| MKK        | rs10928480 | chr02 | 134624264    | G              | 65  | 5.82             | 1.00E-005 | unknown        | -       |
| MKK        | rs9798267  | chr02 | 135846261    | G              | 23  | 5.78             | 1.00E-005 | intron         | ZRANB3  |
| MKK        | rs7577288  | chr02 | 135831971    | T              | 23  | 5.78             | 1.00E-005 | intron         | ZRANB3  |
| MKK        | rs637855   | chr02 | 134928712    | C              | 25  | 5.74             | 1.00E-005 | unknown        | -       |
| MKK        | rs6711370  | chr02 | 135843570    | C              | 23  | 5.73             | 1.00E-005 | intron         | ZRANB3  |
| MKK        | rs935615   | chr02 | 135704886    | T              | 9   | 5.71             | 1.00E-005 | missense       | ZRANB3  |
| MKK        | rs935614   | chr02 | 135649190    | G              | 12  | 5.68             | 1.00E-005 | unknown        | -       |
| MKK        | rs749460   | chr02 | 134984725    | C              | 29  | 5.61             | 1.00E-005 | intron         | TMEM163 |
| MKK        | rs10928484 | chr02 | 134636634    | A              | 64  | 5.58             | 1.00E-005 | unknown        | -       |
| MKK        | rs11674684 | chr02 | 134708891    | A              | 34  | -5.57            | 1.00E-005 | unknown        | -       |
| MKK        | rs7582173  | chr02 | 135479788    | G              | 23  | 5.56             | 1.00E-005 | intron         | YSK4    |
| MKK        | rs1715008  | chr02 | 134533486    | C              | 16  | 5.55             | 1.00E-005 | unknown        | -       |
| MKK        | rs666614   | chr02 | 135006923    | C              | 36  | 5.53             | 1.00E-005 | intron         | TMEM163 |
| MKK        | rs11888951 | chr02 | 135510315    | C              | 25  | 5.51             | 1.00E-005 | unknown        | -       |
| MKK        | rs2289959  | chr02 | 136140374    | C              | 19  | 5.49             | 1.00E-005 | intron         | R3HDM1  |
| MKK        | rs16831899 | chr02 | 136125291    | A              | 17  | 5.48             | 1.00E-005 | intron         | R3HDM1  |
| MKK        | rs11900832 | chr02 | 135498105    | T              | 25  | 5.47             | 1.00E-005 | intron         | YSK4    |
| MKK        | rs610624   | chr02 | 134930232    | C              | 33  | 5.46             | 1.00E-005 | untranslated-3 | TMEM163 |
| MKK        | rs17712107 | chr02 | 134648097    | C              | 62  | 5.46             | 1.00E-005 | unknown        | -       |
| MKK        | rs10197046 | chr02 | 136181435    | C              | 20  | 5.43             | 1.00E-005 | intron         | R3HDM1  |
| MKK        | rs11887041 | chr02 | 134773894    | G              | 52  | 5.43             | 1.00E-005 | intron         | MGAT5   |
| MKK        | rs12691872 | chr02 | 135170502    | C              | 48  | 5.4              | 1.00E-005 | intron         | TMEM163 |
| MKK        | rs6757855  | chr02 | 135290633    | G              | 22  | 5.39             | 1.00E-005 | unknown        | -       |
| MKK        | rs7371043  | chr02 | 136693406    | C              | 56  | 5.39             | 1.00E-005 | unknown        | -       |

Supplementary Table 6J. Top 30 n<sub>S</sub>L outliers (< 1<sup>st</sup> or > 99<sup>th</sup> percentile) for the TSI population.

| Population | SNPId      | chr   | Possition(bp) | Derived_Allele | DAF | n <sub>S</sub> L | P-value   | Function         | Gene    |
|------------|------------|-------|---------------|----------------|-----|------------------|-----------|------------------|---------|
| TSI        | rs17135372 | chr05 | 112532674     | G              | 2   | 5.81             | 4.00E-005 | intron           | MCC     |
| TSI        | rs2255998  | chr14 | 61121435      | G              | 2   | 5.22             | 0.000126  | intron           | -       |
| TSI        | rs1251536  | chr01 | 76206653      | A              | 2   | 5.07             | 0.000158  | unknown          | -       |
| TSI        | rs35407    | chr05 | 33982328      | A              | 2   | 5.05             | 0.000158  | ron,untranslater | SLC45A2 |
| TSI        | rs7225869  | chr17 | 60828075      | A              | 9   | 4.92             | 1.00E-005 | unknown          | -       |
| TSI        | rs6769309  | chr03 | 40475755      | T              | 2   | 4.85             | 2.00E-004 | intron           | RPL14   |
| TSI        | rs3829073  | chr09 | 2117883       | C              | 11  | 4.73             | 1.00E-005 | intron           | SMARCA2 |
| TSI        | rs8043050  | chr15 | 46464675      | C              | 2   | 4.68             | 0.000251  | unknown          | -       |
| TSI        | rs1088673  | chr14 | 61075401      | C              | 12  | 4.68             | 1.00E-005 | intron           | PRKCH   |
| TSI        | rs2105073  | chr14 | 61100961      | G              | 5   | 4.66             | 1.00E-005 | unknown          | -       |
| TSI        | rs4766558  | chr12 | 110148444     | G              | 28  | 4.66             | 1.00E-005 | intron           | CUX2    |
| TSI        | rs933305   | chr12 | 110222670     | A              | 20  | 4.65             | 1.00E-005 | intron           | CUX2    |
| TSI        | rs475107   | chr18 | 7536294       | G              | 28  | 4.63             | 1.00E-005 | unknown          | -       |
| TSI        | rs3094005  | chr06 | 31573026      | T              | 6   | -4.62            | 1.00E-005 | unknown          | -       |
| TSI        | rs4664502  | chr02 | 152306061     | G              | 18  | 4.57             | 1.00E-005 | unknown          | -       |
| TSI        | rs4309576  | chr02 | 152320491     | G              | 17  | 4.56             | 1.00E-005 | unknown          | -       |
| TSI        | rs17016066 | chr12 | 87722428      | A              | 1   | 4.55             | 1.00E-005 | unknown          | -       |
| TSI        | rs7434698  | chr04 | 8762299       | T              | 4   | 4.54             | 0.000631  | unknown          | -       |
| TSI        | rs2971426  | chr01 | 35370701      | A              | 11  | 4.53             | 1.00E-005 | unknown          | -       |
| TSI        | rs11143833 | chr09 | 70623561      | A              | 2   | 4.53             | 0.000316  | intron           | PIP5K1B |
| TSI        | rs1634721  | chr06 | 31085659      | A              | 4   | -4.48            | 0.031623  | unknown          | PBMUCL1 |
| TSI        | rs554825   | chr18 | 7476106       | G              | 30  | 4.48             | 1.00E-005 | unknown          | -       |
| TSI        | rs519282   | chr01 | 65259671      | G              | 8   | 4.45             | 1.00E-005 | unknown          | -       |
| TSI        | rs535857   | chr01 | 65264782      | G              | 8   | 4.45             | 1.00E-005 | unknown          | -       |
| TSI        | rs6930572  | chr06 | 31536148      | G              | 4   | -4.44            | 0.031623  | unknown          | -       |
| TSI        | rs6716286  | chr02 | 152284682     | C              | 16  | 4.42             | 1.00E-005 | intron           | NEB     |
| TSI        | rs998460   | chr04 | 34138953      | T              | 4   | 4.42             | 0.001     | unknown          | -       |
| TSI        | rs10456396 | chr06 | 31612525      | A              | 4   | -4.39            | 0.039811  | unknown          | DDX39B  |
| TSI        | rs1482184  | chr08 | 122604920     | C              | 10  | 4.39             | 1.00E-005 | unknown          | -       |
| TSI        | rs9514153  | chr13 | 102997576     | C              | 18  | 4.38             | 1.00E-005 | unknown          | -       |

Supplementary Table 6K. Top 30 nS<sub>L</sub> outliers (< 1<sup>st</sup> or > 99<sup>th</sup> percentile) for the YRI population.

| Population | SNPId      | chr   | Possition(bp) | Derived_Allele | DAF | nS <sub>L</sub> | P-value   | Function       | Gene     |
|------------|------------|-------|---------------|----------------|-----|-----------------|-----------|----------------|----------|
| YRI        | rs1394121  | chr16 | 22856080      | C              | 19  | 5.45            | 1.00E-005 | unknown        | -        |
| YRI        | rs853040   | chr07 | 80482597      | G              | 16  | -5.28           | 1.00E-005 | unknown        | -        |
| YRI        | rs10281727 | chr07 | 80410578      | T              | 21  | -4.99           | 1.00E-005 | unknown        | -        |
| YRI        | rs7193968  | chr16 | 69230453      | G              | 2   | 4.94            | 5.00E-005 | unknown        | IL34     |
| YRI        | rs17292844 | chr20 | 15067797      | C              | 2   | 4.91            | 6.30E-005 | intron         | -        |
| YRI        | rs4312417  | chr19 | 43489029      | A              | 78  | -4.85           | 1.00E-005 | intron         | YIF1B    |
| YRI        | rs11880532 | chr19 | 43550883      | T              | 80  | -4.83           | 1.00E-005 | intron         | CATSPERG |
| YRI        | rs2866908  | chr04 | 108124957     | A              | 14  | 4.83            | 1.00E-005 | intron         | DKK2     |
| YRI        | rs7120391  | chr11 | 5187483       | C              | 22  | -4.82           | 1.00E-005 | unknown        | -        |
| YRI        | rs10231365 | chr07 | 20398110      | C              | 25  | 4.82            | 1.00E-005 | intron         | ITGB8    |
| YRI        | rs2413395  | chr22 | 34984662      | A              | 7   | 4.82            | 1.00E-005 | intron         | APOL1    |
| YRI        | rs2489043  | chr10 | 102324317     | C              | 25  | 4.81            | 1.00E-005 | unknown        | -        |
| YRI        | rs2270095  | chr19 | 43532736      | T              | 81  | -4.81           | 1.00E-005 | intron         | CATSPERG |
| YRI        | rs8136512  | chr22 | 32461239      | C              | 28  | -4.81           | 1.00E-005 | intron         | LARGE    |
| YRI        | rs6687226  | chr01 | 160158180     | A              | 1   | 4.76            | 1.00E-005 | intron         | ATF6     |
| YRI        | rs11292    | chr10 | 102303597     | G              | 20  | 4.73            | 1.00E-005 | untranslated-3 | HIF1AN   |
| YRI        | rs4821178  | chr22 | 32441978      | G              | 64  | 4.7             | 1.00E-005 | intron         | LARGE    |
| YRI        | rs10234980 | chr07 | 79958990      | T              | 25  | -4.64           | 1.00E-005 | intron         | CD36     |
| YRI        | rs11881305 | chr19 | 43496058      | A              | 80  | -4.63           | 1.00E-005 | intron         | YIF1B    |
| YRI        | rs2088762  | chr19 | 21349675      | C              | 24  | 4.63            | 1.00E-005 | unknown        | ZNF738   |
| YRI        | rs3130186  | chr06 | 33164185      | T              | 10  | 4.63            | 1.00E-005 | unknown        | -        |
| YRI        | rs12693718 | chr02 | 194559758     | C              | 21  | 4.62            | 1.00E-005 | unknown        | -        |
| YRI        | rs943472   | chr06 | 33846420      | C              | 70  | 4.62            | 1.00E-005 | unknown        | -        |
| YRI        | rs6925399  | chr06 | 33610996      | C              | 35  | -4.6            | 1.00E-005 | unknown        | -        |
| YRI        | rs12609878 | chr19 | 43574621      | T              | 80  | -4.6            | 1.00E-005 | intron         | SPRED3   |
| YRI        | rs2012013  | chr19 | 21333646      | T              | 24  | 4.59            | 1.00E-005 | unknown        | ZNF738   |
| YRI        | rs317775   | chr11 | 5503226       | A              | 12  | -4.58           | 1.00E-005 | unknown        | -        |
| YRI        | rs6457736  | chr06 | 33672390      | T              | 56  | 4.58            | 1.00E-005 | unknown        | -        |
| YRI        | rs6929774  | chr06 | 33670698      | C              | 56  | 4.57            | 1.00E-005 | near-gene-5    | -        |
| YRI        | rs8045580  | chr16 | 22920077      | G              | 11  | 4.57            | 1.00E-005 | unknown        | -        |
